# Supplementary material for: A scandium terminal imido complex: synthesis, structure and DFT studies
Source: Royal Society of Chemistry journal article supplement (doi:10.1039/c002870c), 2010-01-01
Supplement: c002870c.pdf [file c002870c.pdf]

## Supporting Information

### A scandium terminal imido complex: synthesis, structure and DFT studies

Erli Lu, Yuexue Li and Yaofeng Chen

#### Contents

|                                                                            |     |
|----------------------------------------------------------------------------|-----|
| 1. General.....                                                            | S2  |
| 2. Synthesis and characterizations of <b>1</b> , <b>2</b> , <b>3</b> ..... | S2  |
| 3. X-ray Crystallography.....                                              | S5  |
| 4. DFT studies of <b>2</b> and <b>3</b> .....                              | S34 |

**General Procedures.** All operations were carried out under an atmosphere of argon using Schlenk techniques or in a nitrogen filled glovebox. THF was distilled from Na-benzophenoneketyl and degassed by freeze-thaw-vacuum prior to use. Toluene, hexane, and C<sub>6</sub>D<sub>6</sub> were dried over Na/K alloy, distilled under vacuum, and stored in the glovebox. 2,6-Diisopropylaniline was purchased from Aldrich, dried over 4Å molecular sieves, distilled under vacuum and degassed by freeze-thaw-vacuum prior to use. *n*-BuLi (2.5 M solution in hexane) and MeLi (1.6 M solution in diethyl ether) were purchased from Acros and directly used. The ligand precursor, CH<sub>3</sub>C(2,6-<sup>*i*</sup>Pr)<sub>2</sub>C<sub>6</sub>H<sub>3</sub>NH)CHC(CH<sub>3</sub>)(NCH<sub>2</sub>CH<sub>2</sub>NMe<sub>2</sub>)(**LH**), was synthesized as we previously reported.<sup>1</sup> <sup>1</sup>H and <sup>13</sup>C NMR spectra were recorded on a Varian 400 MHz spectrometer at 400 MHz and 100 MHz respectively. All chemical shifts were reported in δ units with references to the residual solvent resonance of the deuterated solvents for proton and carbon chemical shifts. Elemental analysis was performed by the Analytical Laboratory of Shanghai Institute of Organic Chemistry.

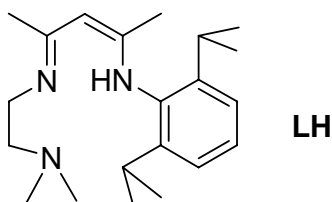

**Synthesis of the lithium salt of ligand.** A solution of **LH** (2.00 g, 6.11 mmol) in 10 mL of THF was added by 2.5 M *n*-BuLi solution (2.70 mL, 6.75 mmol) at -78 °C, and then the reaction mixture was gradually warmed to room temperature. After stirring at room temperature for 4 hours, the volatiles were removed under vacuum to give a yellow solid. The solid was washed by 3 mL of cold hexane and dried under vacuum to give the lithium salt of ligand as a yellow solid (1.95 g, 5.81 mmol, 95 % yield). <sup>1</sup>H NMR (400 MHz, C<sub>6</sub>D<sub>6</sub>, 25 °C): δ (ppm) 7.23-7.21 (m, 2H, ArH), 7.14-7.12 (m, 1H, ArH), 4.94 (s, 1H, MeC(N)CH), 3.41 (sp, <sup>3</sup>J<sub>HH</sub> = 6.8 Hz, 2H, ArCHMe<sub>2</sub>), 3.15 (t, <sup>3</sup>J<sub>HH</sub> = 6.0 Hz, 2H, NCH<sub>2</sub>), 2.03 (t, <sup>3</sup>J<sub>HH</sub> = 6.0 Hz, 2H, NCH<sub>2</sub>), 1.94 (s, 3H, MeC(N)CH),

1.88 (s, 3H, *MeC(N)CH*), 1.62 (s, 6H, *NMe<sub>2</sub>*), 1.29 (d,  $^3J_{\text{HH}} = 6.8$  Hz, 6H, *ArCHMe<sub>2</sub>*), 1.13 (d,  $^3J_{\text{HH}} = 6.8$  Hz, 6H, *ArCHMe<sub>2</sub>*)  $^{13}\text{C}$  NMR (100 MHz,  $\text{C}_6\text{D}_6$ , 25 °C):  $\delta$  (ppm) 165.1, 162.2 (imine C), 150.2, 141.1, 123.3, 122.9 (*ArC*), 93.6 (*MeC(N)CH*), 62.4, 45.7 (*NCH<sub>2</sub>*), 44.1 (*NMe<sub>2</sub>*), 28.1, 25.3, 23.5, 22.8, 20.7 (*Ar<sup>i</sup>Pr* and *MeC*).

**Synthesis of *LScCl<sub>2</sub>* (1).**  $\text{ScCl}_3(\text{THF})_3$  (221 mg, 0.601 mmol) and the lithium salt of ligand (201 mg, 0.599 mmol) were mixed in 5 mL of THF at room temperature. The reaction mixture was stirred for 4 hours at room temperature. The volatiles were removed under vacuum, and the residue was extracted with 5 mL of toluene. Concentration of the extract solution in vacuo to approximately 1 mL and cooling to -35 °C afforded **1** as a pale yellow crystalline solid (217 mg, 0.489 mmol, 81 % yield). **1** is soluble in toluene and benzene, and insoluble in hexane. Anal. Calcd for  $\text{C}_{21}\text{H}_{34}\text{Cl}_2\text{N}_3\text{Sc}$ : C, 56.76; H, 7.71; N, 9.46. Found: C, 56.10; H, 7.89; N, 9.30.  $^1\text{H}$  NMR (400 MHz,  $\text{C}_6\text{D}_6$ , 25 °C):  $\delta$  (ppm) 7.19-7.15 (m, 3H, *ArH*), 5.00 (s, 1H, *MeC(N)CH*), 3.35 (sp,  $^3J_{\text{HH}} = 7.0$  Hz, 2H, *ArCHMe<sub>2</sub>*), 2.83 (t,  $^3J_{\text{HH}} = 6.2$  Hz, 2H, *NCH<sub>2</sub>*), 2.33 (t,  $^3J_{\text{HH}} = 6.2$  Hz, 2H, *NCH<sub>2</sub>*), 2.24 (s, 6H, *NMe<sub>2</sub>*), 1.61 (s, 3H, *MeC(N)CH*), 1.59 (d,  $^3J_{\text{HH}} = 6.4$  Hz, 6H, *ArCHMe<sub>2</sub>*), 1.54 (s, 3H, *MeC(N)CH*), 1.16 (d,  $^3J_{\text{HH}} = 6.8$  Hz, 6H, *ArCHMe<sub>2</sub>*).  $^{13}\text{C}$  NMR (100 MHz,  $\text{C}_6\text{D}_6$ , 25 °C):  $\delta$  (ppm) 167.6, 166.6 (imine C), 145.8, 142.5, 126.6, 124.2 (*ArC*), 100.2 (*MeC(N)CH*), 57.5, 47.7 (*NCH<sub>2</sub>*), 46.1 (*NMe<sub>2</sub>*), 28.6, 25.2, 24.7, 24.3, 23.0 (*Ar<sup>i</sup>Pr* and *MeC*).

**Synthesis of *LSc(Me)(NHAr)* (2).** A solution of **1** (148 mg, 0.333 mmol) in 5 mL of THF was added by 1.6 M MeLi solution (0.480 mL, 0.766 mmol) at -78 °C, and then the reaction mixture was gradually warmed to room temperature. After stirring at room temperature for 4 hours, the volatiles were removed under vacuum. The residue was extracted by 5 mL of toluene. The extraction was added by 2,6-diisopropylaniline (59 mg, 0.333 mmol) at room temperature. The reaction mixture was stirring at room temperature for 24 hours. The volatiles were removed under vacuum, and the residue was washed by cold hexane (0.5 mL x 4) and dried under vacuum to give **2** as a pale

yellow solid (90 mg, 47% yield). **2** is soluble in toluene and benzene, and nearly insoluble in hexane. Anal. Calcd for C<sub>34</sub>H<sub>55</sub>N<sub>4</sub>Sc: C, 72.30; H, 9.82; N, 9.92. Found: C, 72.44; H, 10.13; N, 9.93. <sup>1</sup>H NMR (400 MHz, C<sub>6</sub>D<sub>6</sub>, 25 °C): δ (ppm) 7.18-7.14 (m, 5H, ArH), 6.89 (t, <sup>3</sup>J<sub>HH</sub> = 8.0 Hz, 1H, ArH), 5.70 (s, br, 1H, ArNHSc), 4.99 (s, 1H, MeC(N)CH), 3.65 (sp, <sup>3</sup>J<sub>HH</sub> = 6.8 Hz, 1H, ArCHMe<sub>2</sub>), 3.09 (sp, <sup>3</sup>J<sub>HH</sub> = 6.8 Hz, 1H, ArCHMe<sub>2</sub>), 2.99-2.90 (m, 3H, ArCHMe<sub>2</sub> and NCH<sub>2</sub>), 2.79 (m, 1H, NCH<sub>2</sub>), 2.31 (m, 1H, NCH<sub>2</sub>), 2.20 (m, 1H, NCH<sub>2</sub>), 2.12 (s, 3H, MeC(N)CH), 2.04 (s, 3H, MeC(N)CH), 1.69 (s, 3H, NMe<sub>2</sub>), 1.68 (s, 3H, NMe<sub>2</sub>), 1.38 (d, <sup>3</sup>J<sub>HH</sub> = 7.2 Hz, 6H, ArCHMe<sub>2</sub>), 1.37 (d, <sup>3</sup>J<sub>HH</sub> = 6.8 Hz, 3H, ArCHMe<sub>2</sub>), 1.26 (d, <sup>3</sup>J<sub>HH</sub> = 6.8 Hz, 6H, ArCHMe<sub>2</sub>), 1.24 (d, <sup>3</sup>J<sub>HH</sub> = 6.8 Hz, 3H, ArCHMe<sub>2</sub>), 1.14 (d, <sup>3</sup>J<sub>HH</sub> = 6.8 Hz, 3H, ArCHMe<sub>2</sub>), 1.13 (d, <sup>3</sup>J<sub>HH</sub> = 6.4 Hz, 3H, ArCHMe<sub>2</sub>), -0.50 (s, 3H, ScMe). <sup>13</sup>C NMR (100 MHz, C<sub>6</sub>D<sub>6</sub>, 25 °C): δ (ppm) 166.7, 166.6 (imine C), 150.9, 146.0, 143.6, 142.3, 133.4, 125.9, 124.3, 124.0, 122.9, 116.1 (ArC), 99.3 (MeC(N)CH), 57.3, 47.5 (NCH<sub>2</sub>), 45.8, 45.4 (NMe<sub>2</sub>), 29.8, 28.5, 28.1, 23.2 (Ar<sup>*i*</sup>Pr, MeC and ScMe).

**Synthesis of LSc(NAr)(DMAP) (3).** **2** (129 mg, 0.228 mmol) and 4-(dimethylamino)pyridine (DMAP) (27.8 mg, 0.228 mmol, 1 equiv.) were mixed in 5 mL of toluene. The reaction mixture was stirred for 2 days at 50 °C, and then the volatiles were removed under vacuum. The residue was washed by cold hexane (1 mL x 4) and dried under vacuum to give a red solid. Recrystallization of the red solid in 1 mL of toluene at -35 °C afforded **3** as dark red crystals (97.0 mg, 0.128 mmol, 56%). **3** was sparingly soluble in toluene and benzene, and insoluble in hexane. Anal. Calcd for C<sub>40</sub>H<sub>61</sub>N<sub>6</sub>Sc: C, 71.61; H, 9.16; N, 12.53. Found: C, 70.89; H, 8.95; N, 12.28. <sup>1</sup>H NMR (400 MHz, C<sub>6</sub>D<sub>6</sub>, 25 °C): δ (ppm) 7.88 ppm (d, <sup>3</sup>J<sub>HH</sub> = 8.0 Hz, 1H, ortho H of DMAP), 7.24 (d, <sup>3</sup>J<sub>HH</sub> = 7.6 Hz, 2H, ortho H of DMAP and ArH), 7.11 (m, 1H, ArH), 7.01 (t, <sup>3</sup>J<sub>HH</sub> = 7.2 Hz, 1H, ArH), 6.93-6.87 (m, 3H, ArH), 5.97 (dd, <sup>3</sup>J<sub>HH</sub> = 7.6 Hz, <sup>4</sup>J<sub>HH</sub> = 2.8 Hz, 1H, meta H of DMAP), 5.47 (br, 1H, meta H of DMAP), 5.05 (s, 1H, MeC(N)CH), 3.82 (sp, <sup>3</sup>J<sub>HH</sub> = 6.8 Hz, 1H, ArCHMe<sub>2</sub>), 3.49-3.36 (m, 3H, ArCHMe<sub>2</sub> and NCH<sub>2</sub>), 3.30 (sp, <sup>3</sup>J<sub>HH</sub> = 6.8 Hz, 1H, ArCHMe<sub>2</sub>), 3.20 (m, 1H, NCH<sub>2</sub>), 3.05 (m,

1H, NCH<sub>2</sub>), 2.34 (s, 6H, CH<sub>2</sub>NMe<sub>2</sub> or CNMe<sub>2</sub>), 1.91 (s, 6H, CH<sub>2</sub>NMe<sub>2</sub> or CNMe<sub>2</sub>), 1.82 (s, 3H, MeC(N)CH), 1.73 (s, 3H, MeC(N)CH), 1.45 (d, <sup>3</sup>J<sub>HH</sub> = 6.8 Hz, 3H, ArCHMe<sub>2</sub>), 1.41 (d, <sup>3</sup>J<sub>HH</sub> = 6.8 Hz, 6H, ArCHMe<sub>2</sub>), 1.39 (d, <sup>3</sup>J<sub>HH</sub> = 6.8 Hz, 6H, ArCHMe<sub>2</sub>), 1.21 (d, <sup>3</sup>J<sub>HH</sub> = 6.8 Hz, 3H, ArCHMe<sub>2</sub>), 1.12 (d, <sup>3</sup>J<sub>HH</sub> = 6.8 Hz, 3H, ArCHMe<sub>2</sub>), 1.01(d, <sup>3</sup>J<sub>HH</sub> = 6.8 Hz, 3H, ArCHMe<sub>2</sub>). <sup>13</sup>C NMR (100 MHz, C<sub>6</sub>D<sub>6</sub>, 25 °C): δ (ppm) 166.2, 165.6 (imine C), 152.6, 151.8, 148.2, 143.5, 142.8, 142.2, 133.6, 125.0, 123.8, 123.3, 123.0, 114.7, 109.8, 106.6 (ArC and DMAP's C), 98.5 (MeC(N)CH), 58.4, 48.2, 38.5 (NCH<sub>2</sub>, NMe<sub>2</sub> and CNMe<sub>2</sub>), 28.8, 28.2, 28.0, 25.5, 25.3, 25.0, 24.9, 24.8, 24.7, 24.2, 22.9 (Ar<sup>i</sup>Pr and MeC)

**X-ray Crystallography.** Suitable single crystals of **2** and **3** for X-ray diffraction were grown from the toluene solution, and sealed in thin-walled glass capillaries. Data collection was performed at 20 °C on a Bruker SMART diffractometer with graphite-monochromated Mo K $\alpha$  radiation ( $\lambda$  = 0.71073 Å). The SMART program package was used to determine the unit-cell parameters. The absorption correction was applied using SADABS. The structures were solved by direct methods and refined on  $F^2$  by full-matrix least squares techniques with anisotropic thermal parameters for non-hydrogen atoms. Hydrogen atoms were placed at calculated positions and were included in the structure calculation excepted for the hydrogen atom of anilide functional group in **2**, which was located in Fourier map. All calculations were carried out using the SHELXS-97 program. The software used is listed in the references.<sup>2</sup>

Crystal data for **2**: C<sub>41</sub>H<sub>63</sub>N<sub>4</sub>Sc, M<sub>r</sub> = 656.91 (containing a toluene molecule), T = 293(2) K, Monoclinic, P2(1) / c, a = 16.543(3) Å, b = 15.790(3) Å, c = 15.938(3) Å,  $\beta$  = 100.323(3) °, V = 4095.9(11) Å<sup>3</sup>, Z = 4, F(000) = 1432, 21031 reflections collected, 7614 unique reflections, R1 = 0.0729, wR2 = 0.1752 (I > 2 $\sigma$ (I)).

Table S1 Atomic coordinates ( $\times 10^4$ ) and equivalent isotropic displacement parameters ( $\text{\AA}^2 \times 10^3$ ) for **2.U** (eq) is defined as one third of the trace of the orthogonalized  $U_{ij}$  tensor.

|       | x       | y        | z        | U(eq)  |
|-------|---------|----------|----------|--------|
| Sc(1) | 2945(1) | 8478(1)  | 8737(1)  | 43(1)  |
| N(1)  | 1624(2) | 8637(2)  | 8223(2)  | 43(1)  |
| N(2)  | 2547(2) | 8712(2)  | 9942(2)  | 61(1)  |
| N(3)  | 4096(2) | 8201(2)  | 9807(3)  | 62(1)  |
| N(4)  | 3604(2) | 9291(2)  | 8119(2)  | 52(1)  |
| C(1)  | 295(3)  | 9370(3)  | 8052(3)  | 77(2)  |
| C(2)  | 1124(2) | 9129(3)  | 8561(3)  | 50(1)  |
| C(3)  | 1305(3) | 9461(3)  | 9389(3)  | 60(1)  |
| C(4)  | 1943(3) | 9224(3)  | 10053(3) | 63(1)  |
| C(5)  | 1898(3) | 9573(4)  | 10929(3) | 93(2)  |
| C(6)  | 3084(3) | 8374(4)  | 10725(3) | 89(2)  |
| C(7)  | 3734(3) | 7797(3)  | 10469(3) | 81(2)  |
| C(11) | 1288(2) | 8179(2)  | 7454(3)  | 43(1)  |
| C(12) | 890(2)  | 7408(3)  | 7537(3)  | 52(1)  |
| C(13) | 578(3)  | 6967(3)  | 6800(3)  | 66(1)  |
| C(14) | 666(3)  | 7258(3)  | 6011(3)  | 75(2)  |
| C(15) | 1071(3) | 8002(3)  | 5940(3)  | 65(1)  |
| C(16) | 1380(2) | 8483(3)  | 6649(3)  | 52(1)  |
| C(17) | 809(3)  | 7038(3)  | 8387(3)  | 63(1)  |
| C(18) | -68(3)  | 7074(4)  | 8535(4)  | 105(2) |
| C(19) | 1137(4) | 6132(3)  | 8487(4)  | 94(2)  |
| C(20) | 1795(3) | 9315(3)  | 6516(3)  | 62(1)  |
| C(21) | 1191(3) | 9952(3)  | 6022(4)  | 91(2)  |
| C(22) | 2526(3) | 9197(4)  | 6072(3)  | 85(2)  |
| C(31) | 4495(3) | 9026(3)  | 10110(3) | 81(2)  |
| C(32) | 4747(3) | 7661(3)  | 9589(4)  | 94(2)  |
| C(33) | 3104(3) | 7230(3)  | 8143(3)  | 69(1)  |
| C(40) | 3893(2) | 10087(3) | 7941(3)  | 49(1)  |
| C(41) | 3517(2) | 10813(3) | 8190(3)  | 50(1)  |
| C(42) | 3824(3) | 11596(3) | 8025(3)  | 70(1)  |
| C(43) | 4486(3) | 11693(3) | 7623(3)  | 77(2)  |
| C(44) | 4840(3) | 10984(4) | 7362(3)  | 77(2)  |
| C(45) | 4563(3) | 10177(3) | 7507(3)  | 62(1)  |
| C(46) | 2793(3) | 10763(3) | 8642(3)  | 59(1)  |
| C(47) | 2046(3) | 11243(3) | 8175(4)  | 86(2)  |
| C(48) | 3011(3) | 11080(3) | 9565(3)  | 80(2)  |
| C(49) | 5003(3) | 9431(3)  | 7203(4)  | 86(2)  |

|       |          |          |          |        |
|-------|----------|----------|----------|--------|
| C(50) | 5053(4)  | 9460(5)  | 6263(5)  | 142(3) |
| C(51) | 5839(4)  | 9308(5)  | 7749(5)  | 145(3) |
| C(52) | 2273(10) | 2000(6)  | 5438(9)  | 271(9) |
| C(53) | 1652(6)  | 1883(7)  | 4607(8)  | 201(7) |
| C(54) | 1534(11) | 1454(10) | 3843(11) | 299(9) |
| C(55) | 2205(11) | 1036(12) | 3701(11) | 323(9) |
| C(56) | 2800(7)  | 1141(6)  | 4538(9)  | 192(5) |
| C(57) | 2975(8)  | 1524(8)  | 5334(9)  | 209(6) |
| C(58) | 2224(11) | 2543(11) | 6082(10) | 264(9) |

---

Table S2. Bond lengths (Å) and angles (°) for **2**.

---

|             |           |
|-------------|-----------|
| Sc(1)-N(4)  | 2.047(3)  |
| Sc(1)-N(2)  | 2.171(4)  |
| Sc(1)-N(1)  | 2.206(3)  |
| Sc(1)-C(33) | 2.221(4)  |
| Sc(1)-N(3)  | 2.359(4)  |
| N(1)-C(2)   | 1.318(5)  |
| N(1)-C(11)  | 1.446(5)  |
| N(2)-C(4)   | 1.322(6)  |
| N(2)-C(6)   | 1.494(6)  |
| N(3)-C(7)   | 1.452(6)  |
| N(3)-C(32)  | 1.463(6)  |
| N(3)-C(31)  | 1.500(5)  |
| N(4)-C(40)  | 1.391(5)  |
| N(4)-H(4)   | 0.838(18) |
| C(1)-C(2)   | 1.511(6)  |
| C(1)-H(1A)  | 0.9600    |
| C(1)-H(1B)  | 0.9600    |
| C(1)-H(1C)  | 0.9600    |
| C(2)-C(3)   | 1.402(6)  |
| C(3)-C(4)   | 1.404(6)  |
| C(3)-H(3)   | 0.9300    |
| C(4)-C(5)   | 1.515(6)  |
| C(5)-H(5A)  | 0.9600    |
| C(5)-H(5B)  | 0.9600    |
| C(5)-H(5C)  | 0.9600    |
| C(6)-C(7)   | 1.520(7)  |
| C(6)-H(6A)  | 0.9700    |
| C(6)-H(6B)  | 0.9700    |
| C(7)-H(7A)  | 0.9700    |
| C(7)-H(7B)  | 0.9700    |

|              |          |
|--------------|----------|
| C(11)-C(12)  | 1.401(5) |
| C(11)-C(16)  | 1.403(6) |
| C(12)-C(13)  | 1.384(6) |
| C(12)-C(17)  | 1.503(6) |
| C(13)-C(14)  | 1.371(6) |
| C(13)-H(13)  | 0.9300   |
| C(14)-C(15)  | 1.367(6) |
| C(14)-H(14)  | 0.9300   |
| C(15)-C(16)  | 1.382(6) |
| C(15)-H(15)  | 0.9300   |
| C(16)-C(20)  | 1.515(6) |
| C(17)-C(18)  | 1.512(6) |
| C(17)-C(19)  | 1.527(7) |
| C(17)-H(17)  | 0.9800   |
| C(18)-H(18A) | 0.9600   |
| C(18)-H(18B) | 0.9600   |
| C(18)-H(18C) | 0.9600   |
| C(19)-H(19A) | 0.9600   |
| C(19)-H(19B) | 0.9600   |
| C(19)-H(19C) | 0.9600   |
| C(20)-C(22)  | 1.518(6) |
| C(20)-C(21)  | 1.532(6) |
| C(20)-H(20)  | 0.9800   |
| C(21)-H(21A) | 0.9600   |
| C(21)-H(21B) | 0.9600   |
| C(21)-H(21C) | 0.9600   |
| C(22)-H(22A) | 0.9600   |
| C(22)-H(22B) | 0.9600   |
| C(22)-H(22C) | 0.9600   |
| C(31)-H(31A) | 0.9600   |
| C(31)-H(31B) | 0.9600   |
| C(31)-H(31C) | 0.9600   |
| C(32)-H(32A) | 0.9600   |
| C(32)-H(32B) | 0.9600   |
| C(32)-H(32C) | 0.9600   |
| C(33)-H(33A) | 0.9600   |
| C(33)-H(33B) | 0.9600   |
| C(33)-H(33C) | 0.9600   |
| C(40)-C(41)  | 1.396(5) |
| C(40)-C(45)  | 1.415(5) |
| C(41)-C(42)  | 1.380(6) |
| C(41)-C(46)  | 1.506(5) |
| C(42)-C(43)  | 1.373(6) |
| C(42)-H(42)  | 0.9300   |



|                  |            |
|------------------|------------|
| C(43)-C(44)      | 1.362(7)   |
| C(43)-H(43)      | 0.9300     |
| C(44)-C(45)      | 1.388(6)   |
| C(44)-H(44)      | 0.9300     |
| C(45)-C(49)      | 1.509(6)   |
| C(46)-C(47)      | 1.526(6)   |
| C(46)-C(48)      | 1.534(6)   |
| C(46)-H(46)      | 0.9800     |
| C(47)-H(47A)     | 0.9600     |
| C(47)-H(47B)     | 0.9600     |
| C(47)-H(47C)     | 0.9600     |
| C(48)-H(48A)     | 0.9600     |
| C(48)-H(48B)     | 0.9600     |
| C(48)-H(48C)     | 0.9600     |
| C(49)-C(51)      | 1.509(8)   |
| C(49)-C(50)      | 1.515(8)   |
| C(49)-H(49)      | 0.9800     |
| C(50)-H(50A)     | 0.9600     |
| C(50)-H(50B)     | 0.9600     |
| C(50)-H(50C)     | 0.9600     |
| C(51)-H(51A)     | 0.9600     |
| C(51)-H(51B)     | 0.9600     |
| C(51)-H(51C)     | 0.9600     |
| C(52)-C(58)      | 1.351(12)  |
| C(52)-C(57)      | 1.418(12)  |
| C(52)-C(53)      | 1.535(13)  |
| C(53)-C(54)      | 1.376(14)  |
| C(53)-H(53)      | 0.9300     |
| C(54)-C(55)      | 1.346(15)  |
| C(54)-H(54)      | 0.9300     |
| C(55)-C(56)      | 1.518(13)  |
| C(55)-H(55)      | 0.9300     |
| C(56)-C(57)      | 1.388(12)  |
| C(56)-H(56)      | 0.9300     |
| C(57)-H(57)      | 0.9300     |
| C(58)-H(58A)     | 0.9600     |
| C(58)-H(58B)     | 0.9600     |
| C(58)-H(58C)     | 0.9600     |
| N(4)-Sc(1)-N(2)  | 126.23(15) |
| N(4)-Sc(1)-N(1)  | 109.12(13) |
| N(2)-Sc(1)-N(1)  | 82.63(13)  |
| N(4)-Sc(1)-C(33) | 103.75(17) |
| N(2)-Sc(1)-C(33) | 127.25(17) |
| N(1)-Sc(1)-C(33) | 97.34(14)  |

|                  |            |
|------------------|------------|
| N(4)-Sc(1)-N(3)  | 91.94(14)  |
| N(2)-Sc(1)-N(3)  | 74.04(14)  |
| N(1)-Sc(1)-N(3)  | 155.10(13) |
| C(33)-Sc(1)-N(3) | 90.10(15)  |
| C(2)-N(1)-C(11)  | 117.8(3)   |
| C(2)-N(1)-Sc(1)  | 124.6(3)   |
| C(11)-N(1)-Sc(1) | 117.6(2)   |
| C(4)-N(2)-C(6)   | 117.2(4)   |
| C(4)-N(2)-Sc(1)  | 125.4(3)   |
| C(6)-N(2)-Sc(1)  | 116.7(3)   |
| C(7)-N(3)-C(32)  | 109.4(4)   |
| C(7)-N(3)-C(31)  | 111.3(4)   |
| C(32)-N(3)-C(31) | 106.4(4)   |
| C(7)-N(3)-Sc(1)  | 102.8(3)   |
| C(32)-N(3)-Sc(1) | 118.0(3)   |
| C(31)-N(3)-Sc(1) | 108.8(3)   |
| C(40)-N(4)-Sc(1) | 153.7(3)   |
| C(40)-N(4)-H(4)  | 109(3)     |
| Sc(1)-N(4)-H(4)  | 97(3)      |
| C(2)-C(1)-H(1A)  | 109.5      |
| C(2)-C(1)-H(1B)  | 109.5      |
| H(1A)-C(1)-H(1B) | 109.5      |
| C(2)-C(1)-H(1C)  | 109.5      |
| H(1A)-C(1)-H(1C) | 109.5      |
| H(1B)-C(1)-H(1C) | 109.5      |
| N(1)-C(2)-C(3)   | 124.2(4)   |
| N(1)-C(2)-C(1)   | 120.3(4)   |
| C(3)-C(2)-C(1)   | 115.5(4)   |
| C(4)-C(3)-C(2)   | 127.9(4)   |
| C(4)-C(3)-H(3)   | 116.0      |
| C(2)-C(3)-H(3)   | 116.1      |
| N(2)-C(4)-C(3)   | 123.1(4)   |
| N(2)-C(4)-C(5)   | 120.6(5)   |
| C(3)-C(4)-C(5)   | 116.3(5)   |
| C(4)-C(5)-H(5A)  | 109.5      |
| C(4)-C(5)-H(5B)  | 109.5      |
| H(5A)-C(5)-H(5B) | 109.5      |
| C(4)-C(5)-H(5C)  | 109.5      |
| H(5A)-C(5)-H(5C) | 109.5      |
| H(5B)-C(5)-H(5C) | 109.5      |
| N(2)-C(6)-C(7)   | 109.5(4)   |
| N(2)-C(6)-H(6A)  | 109.8      |
| C(7)-C(6)-H(6A)  | 109.8      |
| N(2)-C(6)-H(6B)  | 109.8      |

|                     |          |
|---------------------|----------|
| C(7)-C(6)-H(6B)     | 109.8    |
| H(6A)-C(6)-H(6B)    | 108.2    |
| N(3)-C(7)-C(6)      | 109.6(4) |
| N(3)-C(7)-H(7A)     | 109.8    |
| C(6)-C(7)-H(7A)     | 109.8    |
| N(3)-C(7)-H(7B)     | 109.8    |
| C(6)-C(7)-H(7B)     | 109.8    |
| H(7A)-C(7)-H(7B)    | 108.2    |
| C(12)-C(11)-C(16)   | 120.9(4) |
| C(12)-C(11)-N(1)    | 118.1(4) |
| C(16)-C(11)-N(1)    | 121.0(4) |
| C(13)-C(12)-C(11)   | 117.8(4) |
| C(13)-C(12)-C(17)   | 119.3(4) |
| C(11)-C(12)-C(17)   | 122.9(4) |
| C(14)-C(13)-C(12)   | 121.6(5) |
| C(14)-C(13)-H(13)   | 119.2    |
| C(12)-C(13)-H(13)   | 119.2    |
| C(15)-C(14)-C(13)   | 119.9(5) |
| C(15)-C(14)-H(14)   | 120.0    |
| C(13)-C(14)-H(14)   | 120.0    |
| C(14)-C(15)-C(16)   | 121.3(5) |
| C(14)-C(15)-H(15)   | 119.4    |
| C(16)-C(15)-H(15)   | 119.4    |
| C(15)-C(16)-C(11)   | 118.4(4) |
| C(15)-C(16)-C(20)   | 118.2(4) |
| C(11)-C(16)-C(20)   | 123.4(4) |
| C(12)-C(17)-C(18)   | 111.6(4) |
| C(12)-C(17)-C(19)   | 111.8(4) |
| C(18)-C(17)-C(19)   | 110.6(4) |
| C(12)-C(17)-H(17)   | 107.5    |
| C(18)-C(17)-H(17)   | 107.5    |
| C(19)-C(17)-H(17)   | 107.5    |
| C(17)-C(18)-H(18A)  | 109.5    |
| C(17)-C(18)-H(18B)  | 109.5    |
| H(18A)-C(18)-H(18B) | 109.5    |
| C(17)-C(18)-H(18C)  | 109.5    |
| H(18A)-C(18)-H(18C) | 109.5    |
| H(18B)-C(18)-H(18C) | 109.5    |
| C(17)-C(19)-H(19A)  | 109.5    |
| C(17)-C(19)-H(19B)  | 109.5    |
| H(19A)-C(19)-H(19B) | 109.5    |
| C(17)-C(19)-H(19C)  | 109.5    |
| H(19A)-C(19)-H(19C) | 109.5    |
| H(19B)-C(19)-H(19C) | 109.5    |

|                     |          |
|---------------------|----------|
| C(16)-C(20)-C(22)   | 112.2(4) |
| C(16)-C(20)-C(21)   | 111.8(4) |
| C(22)-C(20)-C(21)   | 110.0(4) |
| C(16)-C(20)-H(20)   | 107.5    |
| C(22)-C(20)-H(20)   | 107.5    |
| C(21)-C(20)-H(20)   | 107.5    |
| C(20)-C(21)-H(21A)  | 109.5    |
| C(20)-C(21)-H(21B)  | 109.5    |
| H(21A)-C(21)-H(21B) | 109.5    |
| C(20)-C(21)-H(21C)  | 109.5    |
| H(21A)-C(21)-H(21C) | 109.5    |
| H(21B)-C(21)-H(21C) | 109.5    |
| C(20)-C(22)-H(22A)  | 109.5    |
| C(20)-C(22)-H(22B)  | 109.5    |
| H(22A)-C(22)-H(22B) | 109.5    |
| C(20)-C(22)-H(22C)  | 109.5    |
| H(22A)-C(22)-H(22C) | 109.5    |
| H(22B)-C(22)-H(22C) | 109.5    |
| N(3)-C(31)-H(31A)   | 109.5    |
| N(3)-C(31)-H(31B)   | 109.5    |
| H(31A)-C(31)-H(31B) | 109.5    |
| N(3)-C(31)-H(31C)   | 109.5    |
| H(31A)-C(31)-H(31C) | 109.5    |
| H(31B)-C(31)-H(31C) | 109.5    |
| N(3)-C(32)-H(32A)   | 109.5    |
| N(3)-C(32)-H(32B)   | 109.5    |
| H(32A)-C(32)-H(32B) | 109.5    |
| N(3)-C(32)-H(32C)   | 109.5    |
| H(32A)-C(32)-H(32C) | 109.5    |
| H(32B)-C(32)-H(32C) | 109.5    |
| Sc(1)-C(33)-H(33A)  | 109.5    |
| Sc(1)-C(33)-H(33B)  | 109.5    |
| H(33A)-C(33)-H(33B) | 109.5    |
| Sc(1)-C(33)-H(33C)  | 109.5    |
| H(33A)-C(33)-H(33C) | 109.5    |
| H(33B)-C(33)-H(33C) | 109.5    |
| C(41)-C(40)-N(4)    | 119.7(4) |
| C(41)-C(40)-C(45)   | 119.0(4) |
| N(4)-C(40)-C(45)    | 121.2(4) |
| C(42)-C(41)-C(40)   | 118.9(4) |
| C(42)-C(41)-C(46)   | 119.4(4) |
| C(40)-C(41)-C(46)   | 121.8(4) |
| C(43)-C(42)-C(41)   | 122.8(5) |
| C(43)-C(42)-H(42)   | 118.6    |

|                     |          |
|---------------------|----------|
| C(41)-C(42)-H(42)   | 118.6    |
| C(44)-C(43)-C(42)   | 118.2(5) |
| C(44)-C(43)-H(43)   | 120.9    |
| C(42)-C(43)-H(43)   | 120.9    |
| C(43)-C(44)-C(45)   | 122.1(5) |
| C(43)-C(44)-H(44)   | 118.9    |
| C(45)-C(44)-H(44)   | 118.9    |
| C(44)-C(45)-C(40)   | 118.9(4) |
| C(44)-C(45)-C(49)   | 118.1(4) |
| C(40)-C(45)-C(49)   | 123.0(4) |
| C(41)-C(46)-C(47)   | 112.5(4) |
| C(41)-C(46)-C(48)   | 111.8(4) |
| C(47)-C(46)-C(48)   | 109.7(4) |
| C(41)-C(46)-H(46)   | 107.5    |
| C(47)-C(46)-H(46)   | 107.5    |
| C(48)-C(46)-H(46)   | 107.5    |
| C(46)-C(47)-H(47A)  | 109.5    |
| C(46)-C(47)-H(47B)  | 109.5    |
| H(47A)-C(47)-H(47B) | 109.5    |
| C(46)-C(47)-H(47C)  | 109.5    |
| H(47A)-C(47)-H(47C) | 109.5    |
| H(47B)-C(47)-H(47C) | 109.5    |
| C(46)-C(48)-H(48A)  | 109.5    |
| C(46)-C(48)-H(48B)  | 109.5    |
| H(48A)-C(48)-H(48B) | 109.5    |
| C(46)-C(48)-H(48C)  | 109.5    |
| H(48A)-C(48)-H(48C) | 109.5    |
| H(48B)-C(48)-H(48C) | 109.5    |
| C(51)-C(49)-C(45)   | 111.1(5) |
| C(51)-C(49)-C(50)   | 111.5(5) |
| C(45)-C(49)-C(50)   | 114.2(5) |
| C(51)-C(49)-H(49)   | 106.5    |
| C(45)-C(49)-H(49)   | 106.5    |
| C(50)-C(49)-H(49)   | 106.5    |
| C(49)-C(50)-H(50A)  | 109.5    |
| C(49)-C(50)-H(50B)  | 109.5    |
| H(50A)-C(50)-H(50B) | 109.5    |
| C(49)-C(50)-H(50C)  | 109.5    |
| H(50A)-C(50)-H(50C) | 109.5    |
| H(50B)-C(50)-H(50C) | 109.5    |
| C(49)-C(51)-H(51A)  | 109.5    |
| C(49)-C(51)-H(51B)  | 109.5    |
| H(51A)-C(51)-H(51B) | 109.5    |
| C(49)-C(51)-H(51C)  | 109.5    |

|                     |           |
|---------------------|-----------|
| H(51A)-C(51)-H(51C) | 109.5     |
| H(51B)-C(51)-H(51C) | 109.5     |
| C(58)-C(52)-C(57)   | 125.9(15) |
| C(58)-C(52)-C(53)   | 127.6(14) |
| C(57)-C(52)-C(53)   | 105.7(11) |
| C(54)-C(53)-C(52)   | 142.1(15) |
| C(54)-C(53)-H(53)   | 108.9     |
| C(52)-C(53)-H(53)   | 108.9     |
| C(55)-C(54)-C(53)   | 113.5(18) |
| C(55)-C(54)-H(54)   | 123.2     |
| C(53)-C(54)-H(54)   | 123.3     |
| C(54)-C(55)-C(56)   | 102.9(15) |
| C(54)-C(55)-H(55)   | 128.5     |
| C(56)-C(55)-H(55)   | 128.5     |
| C(57)-C(56)-C(55)   | 147.8(13) |
| C(57)-C(56)-H(56)   | 106.1     |
| C(55)-C(56)-H(56)   | 106.1     |
| C(56)-C(57)-C(52)   | 107.3(12) |
| C(56)-C(57)-H(57)   | 126.4     |
| C(52)-C(57)-H(57)   | 126.3     |
| C(52)-C(58)-H(58A)  | 109.5     |
| C(52)-C(58)-H(58B)  | 109.5     |
| H(58A)-C(58)-H(58B) | 109.5     |
| C(52)-C(58)-H(58C)  | 109.4     |
| H(58A)-C(58)-H(58C) | 109.5     |
| H(58B)-C(58)-H(58C) | 109.5     |

Table S3. Anisotropic displacement parameters ( $\text{\AA}^2 \times 10^3$ ) for **2**. The anisotropic displacement factor exponent takes the form:  $-2 \pi^2 [ h^2 a^{*2} U_{11} + \dots + 2 h k a^* b^* U_{12} ]$

|       | U11   | U22   | U33   | U23    | U13   | U12    |
|-------|-------|-------|-------|--------|-------|--------|
| Sc(1) | 37(1) | 43(1) | 50(1) | -1(1)  | 8(1)  | -5(1)  |
| N(1)  | 39(2) | 43(2) | 47(2) | -5(2)  | 10(2) | -3(2)  |
| N(2)  | 57(2) | 79(3) | 49(2) | -9(2)  | 11(2) | -12(2) |
| N(3)  | 54(2) | 60(2) | 68(3) | 8(2)   | 0(2)  | -4(2)  |
| N(4)  | 46(2) | 47(2) | 68(3) | 3(2)   | 22(2) | -1(2)  |
| C(1)  | 56(3) | 82(4) | 93(4) | -12(3) | 11(3) | 19(3)  |
| C(2)  | 42(2) | 46(3) | 66(3) | -1(2)  | 19(2) | -3(2)  |
| C(3)  | 56(3) | 60(3) | 71(4) | -17(3) | 27(3) | -3(2)  |
| C(4)  | 66(3) | 72(3) | 57(3) | -19(3) | 23(3) | -29(3) |

|       |         |         |         |         |         |         |
|-------|---------|---------|---------|---------|---------|---------|
| C(5)  | 96(4)   | 120(5)  | 68(4)   | -40(3)  | 29(3)   | -25(4)  |
| C(6)  | 85(4)   | 126(5)  | 53(3)   | 6(3)    | 4(3)    | -25(4)  |
| C(7)  | 71(3)   | 94(4)   | 71(4)   | 19(3)   | -10(3)  | -2(3)   |
| C(11) | 36(2)   | 46(2)   | 46(3)   | 0(2)    | 3(2)    | 5(2)    |
| C(12) | 48(2)   | 57(3)   | 48(3)   | -4(2)   | 1(2)    | -4(2)   |
| C(13) | 77(3)   | 53(3)   | 61(3)   | -6(3)   | -6(3)   | -11(2)  |
| C(14) | 86(4)   | 73(4)   | 56(3)   | -15(3)  | -13(3)  | 2(3)    |
| C(15) | 87(3)   | 61(3)   | 44(3)   | 0(2)    | 5(3)    | 10(3)   |
| C(16) | 53(2)   | 51(3)   | 51(3)   | -1(2)   | 5(2)    | 10(2)   |
| C(17) | 65(3)   | 63(3)   | 59(3)   | 2(3)    | 5(3)    | -23(2)  |
| C(18) | 85(4)   | 133(5)  | 104(5)  | 12(4)   | 40(4)   | -20(4)  |
| C(19) | 113(4)  | 83(4)   | 79(4)   | 18(3)   | 4(4)    | -23(3)  |
| C(20) | 80(3)   | 53(3)   | 55(3)   | 4(2)    | 13(3)   | 3(2)    |
| C(21) | 112(4)  | 64(3)   | 95(4)   | 23(3)   | 14(4)   | 13(3)   |
| C(22) | 90(4)   | 97(4)   | 73(4)   | 3(3)    | 30(3)   | -2(3)   |
| C(31) | 69(3)   | 75(4)   | 91(4)   | -1(3)   | -11(3)  | -18(3)  |
| C(32) | 64(3)   | 94(4)   | 115(5)  | 3(4)    | -10(3)  | 18(3)   |
| C(33) | 63(3)   | 60(3)   | 82(4)   | -12(3)  | 4(3)    | 3(2)    |
| C(40) | 48(2)   | 52(3)   | 44(3)   | 5(2)    | 2(2)    | -10(2)  |
| C(41) | 48(2)   | 44(3)   | 55(3)   | 0(2)    | 4(2)    | -4(2)   |
| C(42) | 73(3)   | 55(3)   | 81(4)   | 9(3)    | 6(3)    | 1(3)    |
| C(43) | 92(4)   | 57(3)   | 82(4)   | 10(3)   | 15(3)   | -23(3)  |
| C(44) | 73(3)   | 85(4)   | 79(4)   | 6(3)    | 29(3)   | -27(3)  |
| C(45) | 56(3)   | 66(3)   | 65(3)   | 2(3)    | 17(3)   | -17(2)  |
| C(46) | 56(3)   | 44(3)   | 78(4)   | -6(2)   | 10(3)   | -1(2)   |
| C(47) | 56(3)   | 82(4)   | 115(5)  | -7(3)   | 6(3)    | 13(3)   |
| C(48) | 77(3)   | 85(4)   | 83(4)   | -13(3)  | 24(3)   | -7(3)   |
| C(49) | 79(4)   | 78(4)   | 117(5)  | -13(3)  | 59(4)   | -21(3)  |
| C(50) | 123(6)  | 187(8)  | 120(7)  | -46(6)  | 37(5)   | 11(5)   |
| C(51) | 118(6)  | 138(7)  | 169(8)  | -27(5)  | 2(6)    | 50(5)   |
| C(52) | 490(20) | 97(7)   | 316(18) | 25(10)  | 304(18) | -82(12) |
| C(53) | 138(7)  | 201(11) | 240(14) | 161(12) | -27(8)  | -76(7)  |
| C(56) | 212(11) | 136(8)  | 258(14) | 83(9)   | 124(11) | -31(7)  |

Table S4. Torsion angles [deg] for **2**.

|                       |           |
|-----------------------|-----------|
| N(4)-Sc(1)-N(1)-C(2)  | -95.0(3)  |
| N(2)-Sc(1)-N(1)-C(2)  | 30.9(3)   |
| C(33)-Sc(1)-N(1)-C(2) | 157.6(3)  |
| N(3)-Sc(1)-N(1)-C(2)  | 51.3(5)   |
| N(4)-Sc(1)-N(1)-C(11) | 84.0(3)   |
| N(2)-Sc(1)-N(1)-C(11) | -150.2(3) |

|                        |           |
|------------------------|-----------|
| C(33)-Sc(1)-N(1)-C(11) | -23.4(3)  |
| N(3)-Sc(1)-N(1)-C(11)  | -129.8(3) |
| N(4)-Sc(1)-N(2)-C(4)   | 74.0(4)   |
| N(1)-Sc(1)-N(2)-C(4)   | -34.3(3)  |
| C(33)-Sc(1)-N(2)-C(4)  | -127.9(4) |
| N(3)-Sc(1)-N(2)-C(4)   | 154.5(4)  |
| N(4)-Sc(1)-N(2)-C(6)   | -95.8(4)  |
| N(1)-Sc(1)-N(2)-C(6)   | 155.9(3)  |
| C(33)-Sc(1)-N(2)-C(6)  | 62.3(4)   |
| N(3)-Sc(1)-N(2)-C(6)   | -15.3(3)  |
| N(4)-Sc(1)-N(3)-C(7)   | 165.4(3)  |
| N(2)-Sc(1)-N(3)-C(7)   | 38.1(3)   |
| N(1)-Sc(1)-N(3)-C(7)   | 17.0(5)   |
| C(33)-Sc(1)-N(3)-C(7)  | -90.9(3)  |
| N(4)-Sc(1)-N(3)-C(32)  | -74.1(4)  |
| N(2)-Sc(1)-N(3)-C(32)  | 158.6(4)  |
| N(1)-Sc(1)-N(3)-C(32)  | 137.6(4)  |
| C(33)-Sc(1)-N(3)-C(32) | 29.7(4)   |
| N(4)-Sc(1)-N(3)-C(31)  | 47.2(3)   |
| N(2)-Sc(1)-N(3)-C(31)  | -80.0(3)  |
| N(1)-Sc(1)-N(3)-C(31)  | -101.1(4) |
| C(33)-Sc(1)-N(3)-C(31) | 151.0(3)  |
| N(2)-Sc(1)-N(4)-C(40)  | -21.3(7)  |
| N(1)-Sc(1)-N(4)-C(40)  | 73.6(7)   |
| C(33)-Sc(1)-N(4)-C(40) | 176.6(7)  |
| N(3)-Sc(1)-N(4)-C(40)  | -92.8(7)  |
| C(11)-N(1)-C(2)-C(3)   | 165.2(4)  |
| Sc(1)-N(1)-C(2)-C(3)   | -15.8(6)  |
| C(11)-N(1)-C(2)-C(1)   | -14.6(6)  |
| Sc(1)-N(1)-C(2)-C(1)   | 164.4(3)  |
| N(1)-C(2)-C(3)-C(4)    | -13.0(7)  |
| C(1)-C(2)-C(3)-C(4)    | 166.9(4)  |
| C(6)-N(2)-C(4)-C(3)    | -167.8(4) |
| Sc(1)-N(2)-C(4)-C(3)   | 22.4(6)   |
| C(6)-N(2)-C(4)-C(5)    | 10.8(6)   |
| Sc(1)-N(2)-C(4)-C(5)   | -158.9(3) |
| C(2)-C(3)-C(4)-N(2)    | 9.7(7)    |
| C(2)-C(3)-C(4)-C(5)    | -169.0(4) |
| C(4)-N(2)-C(6)-C(7)    | 179.6(4)  |
| Sc(1)-N(2)-C(6)-C(7)   | -9.8(5)   |
| C(32)-N(3)-C(7)-C(6)   | 177.5(4)  |
| C(31)-N(3)-C(7)-C(6)   | 60.1(5)   |
| Sc(1)-N(3)-C(7)-C(6)   | -56.3(4)  |
| N(2)-C(6)-C(7)-N(3)    | 46.2(5)   |



|                         |           |
|-------------------------|-----------|
| C(2)-N(1)-C(11)-C(12)   | -83.7(4)  |
| Sc(1)-N(1)-C(11)-C(12)  | 97.3(3)   |
| C(2)-N(1)-C(11)-C(16)   | 98.4(4)   |
| Sc(1)-N(1)-C(11)-C(16)  | -80.7(4)  |
| C(16)-C(11)-C(12)-C(13) | -1.3(6)   |
| N(1)-C(11)-C(12)-C(13)  | -179.2(4) |
| C(16)-C(11)-C(12)-C(17) | 177.2(4)  |
| N(1)-C(11)-C(12)-C(17)  | -0.7(6)   |
| C(11)-C(12)-C(13)-C(14) | 1.3(7)    |
| C(17)-C(12)-C(13)-C(14) | -177.2(4) |
| C(12)-C(13)-C(14)-C(15) | 0.1(8)    |
| C(13)-C(14)-C(15)-C(16) | -1.7(7)   |
| C(14)-C(15)-C(16)-C(11) | 1.8(7)    |
| C(14)-C(15)-C(16)-C(20) | -177.8(4) |
| C(12)-C(11)-C(16)-C(15) | -0.2(6)   |
| N(1)-C(11)-C(16)-C(15)  | 177.6(4)  |
| C(12)-C(11)-C(16)-C(20) | 179.3(4)  |
| N(1)-C(11)-C(16)-C(20)  | -2.9(6)   |
| C(13)-C(12)-C(17)-C(18) | -71.9(6)  |
| C(11)-C(12)-C(17)-C(18) | 109.6(5)  |
| C(13)-C(12)-C(17)-C(19) | 52.5(6)   |
| C(11)-C(12)-C(17)-C(19) | -125.9(4) |
| C(15)-C(16)-C(20)-C(22) | -59.1(5)  |
| C(11)-C(16)-C(20)-C(22) | 121.4(5)  |
| C(15)-C(16)-C(20)-C(21) | 65.0(5)   |
| C(11)-C(16)-C(20)-C(21) | -114.5(5) |
| Sc(1)-N(4)-C(40)-C(41)  | -16.1(9)  |
| Sc(1)-N(4)-C(40)-C(45)  | 164.2(5)  |
| N(4)-C(40)-C(41)-C(42)  | 178.6(4)  |
| C(45)-C(40)-C(41)-C(42) | -1.7(6)   |
| N(4)-C(40)-C(41)-C(46)  | -0.6(6)   |
| C(45)-C(40)-C(41)-C(46) | 179.1(4)  |
| C(40)-C(41)-C(42)-C(43) | 0.2(7)    |
| C(46)-C(41)-C(42)-C(43) | 179.4(4)  |
| C(41)-C(42)-C(43)-C(44) | 1.4(8)    |
| C(42)-C(43)-C(44)-C(45) | -1.4(8)   |
| C(43)-C(44)-C(45)-C(40) | -0.1(8)   |
| C(43)-C(44)-C(45)-C(49) | -179.3(5) |
| C(41)-C(40)-C(45)-C(44) | 1.7(6)    |
| N(4)-C(40)-C(45)-C(44)  | -178.6(4) |
| C(41)-C(40)-C(45)-C(49) | -179.2(5) |
| N(4)-C(40)-C(45)-C(49)  | 0.5(7)    |
| C(42)-C(41)-C(46)-C(47) | 57.5(6)   |
| C(40)-C(41)-C(46)-C(47) | -123.4(5) |

|                         |            |
|-------------------------|------------|
| C(42)-C(41)-C(46)-C(48) | -66.5(5)   |
| C(40)-C(41)-C(46)-C(48) | 112.7(5)   |
| C(44)-C(45)-C(49)-C(51) | 72.3(7)    |
| C(40)-C(45)-C(49)-C(51) | -106.8(6)  |
| C(44)-C(45)-C(49)-C(50) | -54.9(7)   |
| C(40)-C(45)-C(49)-C(50) | 126.0(5)   |
| C(58)-C(52)-C(53)-C(54) | 175.1(17)  |
| C(57)-C(52)-C(53)-C(54) | 4.5(18)    |
| C(52)-C(53)-C(54)-C(55) | -8(3)      |
| C(53)-C(54)-C(55)-C(56) | 6.8(19)    |
| C(54)-C(55)-C(56)-C(57) | -8(3)      |
| C(55)-C(56)-C(57)-C(52) | 5(2)       |
| C(58)-C(52)-C(57)-C(56) | -172.0(12) |
| C(53)-C(52)-C(57)-C(56) | -1.2(11)   |

---

Crystal data for **3**: C<sub>47</sub>H<sub>69</sub>N<sub>6</sub>Sc,  $M_r = 763.04$  (containing a toluene molecule),  $T = 293(2)$  K, Monoclinic, C2/c,  $a = 25.451(4)$  Å,  $b = 11.1475(16)$  Å,  $c = 34.342(5)$  Å,  $\beta = 105.936(3)^\circ$ ,  $V = 9369(2)$  Å<sup>3</sup>,  $Z = 8$ ,  $F(000) = 3312$ , 24126 reflections collected, 8790 unique reflections,  $R1 = 0.0759$ ,  $wR2 = 0.1797$  ( $I > 2\sigma(I)$ )

Table S5 Atomic coordinates ( $\times 10^4$ ) and equivalent isotropic displacement parameters (Å<sup>2</sup>  $\times 10^3$ ) for **3**. U (eq) is defined as one third of the trace of the orthogonalized U<sub>ij</sub> tensor.

|       | x       | y       | z       | U(eq)  |
|-------|---------|---------|---------|--------|
| Sc(1) | 4061(1) | 6207(1) | 5804(1) | 55(1)  |
| N(1)  | 3372(2) | 5769(4) | 6065(2) | 58(1)  |
| N(2)  | 3399(2) | 6558(5) | 5252(2) | 61(2)  |
| N(3)  | 4483(2) | 7247(4) | 5358(2) | 62(1)  |
| N(4)  | 4448(2) | 7535(5) | 6301(2) | 68(2)  |
| N(5)  | 5422(3) | 9911(6) | 7131(2) | 99(2)  |
| N(6)  | 4489(2) | 4809(4) | 5854(2) | 60(1)  |
| C(1)  | 2539(3) | 4583(7) | 6039(2) | 107(3) |
| C(2)  | 2912(3) | 5241(6) | 5846(2) | 72(2)  |
| C(3)  | 2744(3) | 5254(6) | 5415(2) | 76(2)  |
| C(4)  | 2943(3) | 5916(6) | 5143(2) | 67(2)  |
| C(5)  | 2594(3) | 5874(7) | 4715(2) | 99(3)  |
| C(6)  | 3519(3) | 7315(7) | 4949(2) | 88(2)  |
| C(7)  | 4038(3) | 8030(6) | 5117(2) | 77(2)  |
| C(11) | 3448(2) | 5889(6) | 6489(2) | 62(2)  |
| C(12) | 3255(2) | 6932(6) | 6636(2) | 65(2)  |
| C(13) | 3336(3) | 7068(7) | 7050(2) | 84(2)  |
| C(14) | 3621(3) | 6226(8) | 7319(2) | 89(2)  |
| C(15) | 3814(3) | 5216(8) | 7177(2) | 87(2)  |
| C(16) | 3734(3) | 5020(7) | 6762(2) | 78(2)  |
| C(17) | 3937(4) | 3863(8) | 6622(2) | 109(3) |
| C(18) | 3643(5) | 2751(8) | 6727(3) | 172(5) |
| C(19) | 4552(4) | 3727(9) | 6799(3) | 176(5) |
| C(20) | 2931(3) | 7874(6) | 6343(2) | 75(2)  |
| C(21) | 3084(3) | 9155(6) | 6487(2) | 109(3) |
| C(22) | 2326(3) | 7714(8) | 6268(3) | 133(4) |
| C(31) | 4976(3) | 7979(6) | 5523(2) | 89(2)  |
| C(32) | 4624(3) | 6308(6) | 5100(2) | 84(2)  |
| C(33) | 4391(3) | 8734(8) | 6265(2) | 84(2)  |
| C(34) | 4695(3) | 9550(7) | 6527(2) | 84(2)  |
| C(35) | 5100(3) | 9164(7) | 6863(3) | 79(2)  |
| C(36) | 5147(3) | 7930(7) | 6915(2) | 87(2)  |

|       |         |          |         |         |
|-------|---------|----------|---------|---------|
| C(37) | 4827(3) | 7188(7)  | 6631(3) | 88(2)   |
| C(38) | 5831(3) | 9484(7)  | 7491(2) | 108(3)  |
| C(39) | 5403(4) | 11192(7) | 7060(3) | 156(4)  |
| C(40) | 4726(2) | 3732(6)  | 5830(2) | 57(2)   |
| C(41) | 4428(3) | 2728(6)  | 5630(2) | 64(2)   |
| C(42) | 4682(3) | 1646(6)  | 5603(2) | 78(2)   |
| C(43) | 5234(3) | 1483(6)  | 5772(2) | 85(2)   |
| C(44) | 5533(3) | 2440(6)  | 5972(2) | 77(2)   |
| C(45) | 5297(3) | 3550(5)  | 6011(2) | 60(2)   |
| C(46) | 5654(3) | 4573(6)  | 6225(2) | 79(2)   |
| C(47) | 5995(3) | 4275(8)  | 6654(2) | 120(3)  |
| C(48) | 6028(3) | 5040(7)  | 5971(2) | 101(3)  |
| C(49) | 3823(3) | 2857(6)  | 5431(2) | 81(2)   |
| C(50) | 3703(3) | 3045(9)  | 4994(3) | 137(4)  |
| C(51) | 3470(3) | 1829(8)  | 5516(3) | 148(4)  |
| C(52) | 2278(6) | 3620(13) | 7123(4) | 209(6)  |
| C(53) | 2168(5) | 4773(12) | 7124(4) | 219(6)  |
| C(54) | 1693(6) | 5122(12) | 6824(5) | 222(6)  |
| C(55) | 1361(6) | 4337(14) | 6541(4) | 227(6)  |
| C(56) | 1544(7) | 3206(14) | 6601(5) | 261(8)  |
| C(57) | 2001(5) | 2749(11) | 6848(4) | 204(5)  |
| C(58) | 2737(7) | 3078(17) | 7387(6) | 396(13) |

Table S6. Bond lengths (Å) and angles (°) for **3**.

|            |          |
|------------|----------|
| Sc(1)-N(6) | 1.881(5) |
| Sc(1)-N(2) | 2.198(5) |
| Sc(1)-N(1) | 2.232(5) |
| Sc(1)-N(4) | 2.271(5) |
| Sc(1)-N(3) | 2.396(5) |
| N(1)-C(2)  | 1.341(8) |
| N(1)-C(11) | 1.424(7) |
| N(2)-C(4)  | 1.327(7) |
| N(2)-C(6)  | 1.437(8) |
| N(3)-C(31) | 1.473(7) |
| N(3)-C(32) | 1.478(7) |
| N(3)-C(7)  | 1.488(7) |
| N(4)-C(37) | 1.327(8) |
| N(4)-C(33) | 1.347(8) |
| N(5)-C(35) | 1.341(8) |
| N(5)-C(39) | 1.448(9) |
| N(5)-C(38) | 1.461(8) |

|              |           |
|--------------|-----------|
| N(6)-C(40)   | 1.357(7)  |
| C(1)-C(2)    | 1.489(9)  |
| C(1)-H(1A)   | 0.9600    |
| C(1)-H(1B)   | 0.9600    |
| C(1)-H(1C)   | 0.9600    |
| C(2)-C(3)    | 1.427(9)  |
| C(3)-C(4)    | 1.390(9)  |
| C(3)-H(3)    | 0.9300    |
| C(4)-C(5)    | 1.494(8)  |
| C(5)-H(5A)   | 0.9600    |
| C(5)-H(5B)   | 0.9600    |
| C(5)-H(5C)   | 0.9600    |
| C(6)-C(7)    | 1.514(8)  |
| C(6)-H(6A)   | 0.9700    |
| C(6)-H(6B)   | 0.9700    |
| C(7)-H(7A)   | 0.9700    |
| C(7)-H(7B)   | 0.9700    |
| C(11)-C(16)  | 1.405(8)  |
| C(11)-C(12)  | 1.408(8)  |
| C(12)-C(13)  | 1.388(8)  |
| C(12)-C(20)  | 1.529(8)  |
| C(13)-C(14)  | 1.374(9)  |
| C(13)-H(13)  | 0.9300    |
| C(14)-C(15)  | 1.369(9)  |
| C(14)-H(14)  | 0.9300    |
| C(15)-C(16)  | 1.400(9)  |
| C(15)-H(15)  | 0.9300    |
| C(16)-C(17)  | 1.516(10) |
| C(17)-C(19)  | 1.524(11) |
| C(17)-C(18)  | 1.541(11) |
| C(17)-H(17)  | 0.9800    |
| C(18)-H(18A) | 0.9600    |
| C(18)-H(18B) | 0.9600    |
| C(18)-H(18C) | 0.9600    |
| C(19)-H(19A) | 0.9600    |
| C(19)-H(19B) | 0.9600    |
| C(19)-H(19C) | 0.9600    |
| C(20)-C(22)  | 1.500(9)  |
| C(20)-C(21)  | 1.526(9)  |
| C(20)-H(20)  | 0.9800    |
| C(21)-H(21A) | 0.9600    |
| C(21)-H(21B) | 0.9600    |
| C(21)-H(21C) | 0.9600    |
| C(22)-H(22A) | 0.9600    |

|              |           |
|--------------|-----------|
| C(22)-H(22B) | 0.9600    |
| C(22)-H(22C) | 0.9600    |
| C(31)-H(31A) | 0.9600    |
| C(31)-H(31B) | 0.9600    |
| C(31)-H(31C) | 0.9600    |
| C(32)-H(32A) | 0.9600    |
| C(32)-H(32B) | 0.9600    |
| C(32)-H(32C) | 0.9600    |
| C(33)-C(34)  | 1.361(9)  |
| C(33)-H(33)  | 0.9300    |
| C(34)-C(35)  | 1.389(9)  |
| C(34)-H(34)  | 0.9300    |
| C(35)-C(36)  | 1.389(9)  |
| C(36)-C(37)  | 1.365(9)  |
| C(36)-H(36)  | 0.9300    |
| C(37)-H(37)  | 0.9300    |
| C(38)-H(38A) | 0.9600    |
| C(38)-H(38B) | 0.9600    |
| C(38)-H(38C) | 0.9600    |
| C(39)-H(39A) | 0.9600    |
| C(39)-H(39B) | 0.9600    |
| C(39)-H(39C) | 0.9600    |
| C(40)-C(41)  | 1.421(8)  |
| C(40)-C(45)  | 1.428(8)  |
| C(41)-C(42)  | 1.383(8)  |
| C(41)-C(49)  | 1.510(8)  |
| C(42)-C(43)  | 1.377(8)  |
| C(42)-H(42)  | 0.9300    |
| C(43)-C(44)  | 1.381(8)  |
| C(43)-H(43)  | 0.9300    |
| C(44)-C(45)  | 1.397(8)  |
| C(44)-H(44)  | 0.9300    |
| C(45)-C(46)  | 1.516(8)  |
| C(46)-C(47)  | 1.528(9)  |
| C(46)-C(48)  | 1.548(9)  |
| C(46)-H(46)  | 0.9800    |
| C(47)-H(47A) | 0.9600    |
| C(47)-H(47B) | 0.9600    |
| C(47)-H(47C) | 0.9600    |
| C(48)-H(48A) | 0.9600    |
| C(48)-H(48B) | 0.9600    |
| C(48)-H(48C) | 0.9600    |
| C(49)-C(50)  | 1.461(10) |
| C(49)-C(51)  | 1.534(9)  |

|                  |            |
|------------------|------------|
| C(49)-H(49)      | 0.9800     |
| C(50)-H(50A)     | 0.9600     |
| C(50)-H(50B)     | 0.9600     |
| C(50)-H(50C)     | 0.9600     |
| C(51)-H(51A)     | 0.9600     |
| C(51)-H(51B)     | 0.9600     |
| C(51)-H(51C)     | 0.9600     |
| C(52)-C(53)      | 1.316(12)  |
| C(52)-C(57)      | 1.401(12)  |
| C(52)-C(58)      | 1.404(13)  |
| C(53)-C(54)      | 1.409(12)  |
| C(53)-H(53)      | 0.9300     |
| C(54)-C(55)      | 1.406(13)  |
| C(54)-H(54)      | 0.9300     |
| C(55)-C(56)      | 1.341(13)  |
| C(55)-H(55)      | 0.9300     |
| C(56)-C(57)      | 1.337(13)  |
| C(56)-H(56)      | 0.9300     |
| C(57)-H(57)      | 0.9300     |
| C(58)-H(58A)     | 0.9709     |
| C(58)-H(58B)     | 0.9712     |
| C(58)-H(58C)     | 0.9708     |
| N(6)-Sc(1)-N(2)  | 120.9(2)   |
| N(6)-Sc(1)-N(1)  | 106.34(19) |
| N(2)-Sc(1)-N(1)  | 83.3(2)    |
| N(6)-Sc(1)-N(4)  | 110.5(2)   |
| N(2)-Sc(1)-N(4)  | 127.2(2)   |
| N(1)-Sc(1)-N(4)  | 93.8(2)    |
| N(6)-Sc(1)-N(3)  | 96.3(2)    |
| N(2)-Sc(1)-N(3)  | 74.6(2)    |
| N(1)-Sc(1)-N(3)  | 154.35(18) |
| N(4)-Sc(1)-N(3)  | 89.28(19)  |
| C(2)-N(1)-C(11)  | 117.8(6)   |
| C(2)-N(1)-Sc(1)  | 122.2(4)   |
| C(11)-N(1)-Sc(1) | 119.4(4)   |
| C(4)-N(2)-C(6)   | 117.1(6)   |
| C(4)-N(2)-Sc(1)  | 123.4(4)   |
| C(6)-N(2)-Sc(1)  | 117.7(4)   |
| C(31)-N(3)-C(32) | 107.5(5)   |
| C(31)-N(3)-C(7)  | 109.1(5)   |
| C(32)-N(3)-C(7)  | 110.7(5)   |
| C(31)-N(3)-Sc(1) | 120.4(4)   |
| C(32)-N(3)-Sc(1) | 105.4(4)   |
| C(7)-N(3)-Sc(1)  | 103.5(4)   |

|                   |          |
|-------------------|----------|
| C(37)-N(4)-C(33)  | 113.7(6) |
| C(37)-N(4)-Sc(1)  | 121.0(5) |
| C(33)-N(4)-Sc(1)  | 124.3(5) |
| C(35)-N(5)-C(39)  | 120.7(7) |
| C(35)-N(5)-C(38)  | 122.5(7) |
| C(39)-N(5)-C(38)  | 116.6(7) |
| C(40)-N(6)-Sc(1)  | 169.6(5) |
| C(2)-C(1)-H(1A)   | 109.5    |
| C(2)-C(1)-H(1B)   | 109.5    |
| H(1A)-C(1)-H(1B)  | 109.5    |
| C(2)-C(1)-H(1C)   | 109.5    |
| H(1A)-C(1)-H(1C)  | 109.5    |
| H(1B)-C(1)-H(1C)  | 109.5    |
| N(1)-C(2)-C(3)    | 122.9(6) |
| N(1)-C(2)-C(1)    | 122.2(7) |
| C(3)-C(2)-C(1)    | 114.8(7) |
| C(4)-C(3)-C(2)    | 130.0(7) |
| C(4)-C(3)-H(3)    | 115.0    |
| C(2)-C(3)-H(3)    | 115.0    |
| N(2)-C(4)-C(3)    | 123.3(6) |
| N(2)-C(4)-C(5)    | 122.2(7) |
| C(3)-C(4)-C(5)    | 114.5(7) |
| C(4)-C(5)-H(5A)   | 109.5    |
| C(4)-C(5)-H(5B)   | 109.5    |
| H(5A)-C(5)-H(5B)  | 109.5    |
| C(4)-C(5)-H(5C)   | 109.4    |
| H(5A)-C(5)-H(5C)  | 109.5    |
| H(5B)-C(5)-H(5C)  | 109.5    |
| N(2)-C(6)-C(7)    | 111.6(6) |
| N(2)-C(6)-H(6A)   | 109.3    |
| C(7)-C(6)-H(6A)   | 109.3    |
| N(2)-C(6)-H(6B)   | 109.3    |
| C(7)-C(6)-H(6B)   | 109.3    |
| H(6A)-C(6)-H(6B)  | 107.9    |
| N(3)-C(7)-C(6)    | 110.8(5) |
| N(3)-C(7)-H(7A)   | 109.4    |
| C(6)-C(7)-H(7A)   | 109.5    |
| N(3)-C(7)-H(7B)   | 109.5    |
| C(6)-C(7)-H(7B)   | 109.5    |
| H(7A)-C(7)-H(7B)  | 108.1    |
| C(16)-C(11)-C(12) | 119.9(7) |
| C(16)-C(11)-N(1)  | 121.2(6) |
| C(12)-C(11)-N(1)  | 118.8(6) |
| C(13)-C(12)-C(11) | 119.2(7) |



|                     |          |
|---------------------|----------|
| C(13)-C(12)-C(20)   | 120.0(7) |
| C(11)-C(12)-C(20)   | 120.7(6) |
| C(14)-C(13)-C(12)   | 121.0(8) |
| C(14)-C(13)-H(13)   | 119.5    |
| C(12)-C(13)-H(13)   | 119.5    |
| C(15)-C(14)-C(13)   | 119.8(7) |
| C(15)-C(14)-H(14)   | 120.1    |
| C(13)-C(14)-H(14)   | 120.1    |
| C(14)-C(15)-C(16)   | 121.6(7) |
| C(14)-C(15)-H(15)   | 119.2    |
| C(16)-C(15)-H(15)   | 119.2    |
| C(15)-C(16)-C(11)   | 118.3(7) |
| C(15)-C(16)-C(17)   | 119.4(7) |
| C(11)-C(16)-C(17)   | 122.3(7) |
| C(16)-C(17)-C(19)   | 111.0(8) |
| C(16)-C(17)-C(18)   | 112.4(7) |
| C(19)-C(17)-C(18)   | 109.8(7) |
| C(16)-C(17)-H(17)   | 107.9    |
| C(19)-C(17)-H(17)   | 107.8    |
| C(18)-C(17)-H(17)   | 107.8    |
| C(17)-C(18)-H(18A)  | 109.4    |
| C(17)-C(18)-H(18B)  | 109.6    |
| H(18A)-C(18)-H(18B) | 109.5    |
| C(17)-C(18)-H(18C)  | 109.4    |
| H(18A)-C(18)-H(18C) | 109.5    |
| H(18B)-C(18)-H(18C) | 109.5    |
| C(17)-C(19)-H(19A)  | 109.5    |
| C(17)-C(19)-H(19B)  | 109.5    |
| H(19A)-C(19)-H(19B) | 109.5    |
| C(17)-C(19)-H(19C)  | 109.4    |
| H(19A)-C(19)-H(19C) | 109.5    |
| H(19B)-C(19)-H(19C) | 109.5    |
| C(22)-C(20)-C(21)   | 109.0(6) |
| C(22)-C(20)-C(12)   | 112.0(6) |
| C(21)-C(20)-C(12)   | 112.7(6) |
| C(22)-C(20)-H(20)   | 107.6    |
| C(21)-C(20)-H(20)   | 107.7    |
| C(12)-C(20)-H(20)   | 107.7    |
| C(20)-C(21)-H(21A)  | 109.5    |
| C(20)-C(21)-H(21B)  | 109.5    |
| H(21A)-C(21)-H(21B) | 109.5    |
| C(20)-C(21)-H(21C)  | 109.4    |
| H(21A)-C(21)-H(21C) | 109.5    |
| H(21B)-C(21)-H(21C) | 109.5    |

|                     |          |
|---------------------|----------|
| C(20)-C(22)-H(22A)  | 109.5    |
| C(20)-C(22)-H(22B)  | 109.5    |
| H(22A)-C(22)-H(22B) | 109.5    |
| C(20)-C(22)-H(22C)  | 109.4    |
| H(22A)-C(22)-H(22C) | 109.5    |
| H(22B)-C(22)-H(22C) | 109.5    |
| N(3)-C(31)-H(31A)   | 109.5    |
| N(3)-C(31)-H(31B)   | 109.5    |
| H(31A)-C(31)-H(31B) | 109.5    |
| N(3)-C(31)-H(31C)   | 109.4    |
| H(31A)-C(31)-H(31C) | 109.5    |
| H(31B)-C(31)-H(31C) | 109.5    |
| N(3)-C(32)-H(32A)   | 109.5    |
| N(3)-C(32)-H(32B)   | 109.5    |
| H(32A)-C(32)-H(32B) | 109.5    |
| N(3)-C(32)-H(32C)   | 109.4    |
| H(32A)-C(32)-H(32C) | 109.5    |
| H(32B)-C(32)-H(32C) | 109.5    |
| N(4)-C(33)-C(34)    | 125.1(7) |
| N(4)-C(33)-H(33)    | 117.5    |
| C(34)-C(33)-H(33)   | 117.4    |
| C(33)-C(34)-C(35)   | 120.0(7) |
| C(33)-C(34)-H(34)   | 120.0    |
| C(35)-C(34)-H(34)   | 120.0    |
| N(5)-C(35)-C(36)    | 120.8(8) |
| N(5)-C(35)-C(34)    | 123.5(7) |
| C(36)-C(35)-C(34)   | 115.6(8) |
| C(37)-C(36)-C(35)   | 119.6(8) |
| C(37)-C(36)-H(36)   | 120.2    |
| C(35)-C(36)-H(36)   | 120.2    |
| N(4)-C(37)-C(36)    | 125.8(7) |
| N(4)-C(37)-H(37)    | 117.1    |
| C(36)-C(37)-H(37)   | 117.1    |
| N(5)-C(38)-H(38A)   | 109.5    |
| N(5)-C(38)-H(38B)   | 109.5    |
| H(38A)-C(38)-H(38B) | 109.5    |
| N(5)-C(38)-H(38C)   | 109.5    |
| H(38A)-C(38)-H(38C) | 109.5    |
| H(38B)-C(38)-H(38C) | 109.5    |
| N(5)-C(39)-H(39A)   | 109.6    |
| N(5)-C(39)-H(39B)   | 109.4    |
| H(39A)-C(39)-H(39B) | 109.5    |
| N(5)-C(39)-H(39C)   | 109.4    |
| H(39A)-C(39)-H(39C) | 109.5    |

|                     |          |
|---------------------|----------|
| H(39B)-C(39)-H(39C) | 109.5    |
| N(6)-C(40)-C(41)    | 122.6(6) |
| N(6)-C(40)-C(45)    | 121.0(6) |
| C(41)-C(40)-C(45)   | 116.3(6) |
| C(42)-C(41)-C(40)   | 121.4(6) |
| C(42)-C(41)-C(49)   | 119.4(6) |
| C(40)-C(41)-C(49)   | 119.2(6) |
| C(43)-C(42)-C(41)   | 122.0(7) |
| C(43)-C(42)-H(42)   | 119.0    |
| C(41)-C(42)-H(42)   | 119.0    |
| C(42)-C(43)-C(44)   | 117.8(7) |
| C(42)-C(43)-H(43)   | 121.1    |
| C(44)-C(43)-H(43)   | 121.1    |
| C(43)-C(44)-C(45)   | 122.6(7) |
| C(43)-C(44)-H(44)   | 118.7    |
| C(45)-C(44)-H(44)   | 118.7    |
| C(44)-C(45)-C(40)   | 119.8(6) |
| C(44)-C(45)-C(46)   | 119.7(6) |
| C(40)-C(45)-C(46)   | 120.4(5) |
| C(45)-C(46)-C(47)   | 114.2(6) |
| C(45)-C(46)-C(48)   | 111.1(6) |
| C(47)-C(46)-C(48)   | 110.0(6) |
| C(45)-C(46)-H(46)   | 107.1    |
| C(47)-C(46)-H(46)   | 107.0    |
| C(48)-C(46)-H(46)   | 107.1    |
| C(46)-C(47)-H(47A)  | 109.5    |
| C(46)-C(47)-H(47B)  | 109.5    |
| H(47A)-C(47)-H(47B) | 109.5    |
| C(46)-C(47)-H(47C)  | 109.4    |
| H(47A)-C(47)-H(47C) | 109.5    |
| H(47B)-C(47)-H(47C) | 109.5    |
| C(46)-C(48)-H(48A)  | 109.5    |
| C(46)-C(48)-H(48B)  | 109.5    |
| H(48A)-C(48)-H(48B) | 109.5    |
| C(46)-C(48)-H(48C)  | 109.5    |
| H(48A)-C(48)-H(48C) | 109.5    |
| H(48B)-C(48)-H(48C) | 109.5    |
| C(50)-C(49)-C(41)   | 112.2(6) |
| C(50)-C(49)-C(51)   | 109.6(7) |
| C(41)-C(49)-C(51)   | 114.8(7) |
| C(50)-C(49)-H(49)   | 106.6    |
| C(41)-C(49)-H(49)   | 106.6    |
| C(51)-C(49)-H(49)   | 106.6    |
| C(49)-C(50)-H(50A)  | 109.5    |

|                     |           |
|---------------------|-----------|
| C(49)-C(50)-H(50B)  | 109.5     |
| H(50A)-C(50)-H(50B) | 109.5     |
| C(49)-C(50)-H(50C)  | 109.4     |
| H(50A)-C(50)-H(50C) | 109.5     |
| H(50B)-C(50)-H(50C) | 109.5     |
| C(49)-C(51)-H(51A)  | 109.5     |
| C(49)-C(51)-H(51B)  | 109.5     |
| H(51A)-C(51)-H(51B) | 109.5     |
| C(49)-C(51)-H(51C)  | 109.5     |
| H(51A)-C(51)-H(51C) | 109.5     |
| H(51B)-C(51)-H(51C) | 109.5     |
| C(53)-C(52)-C(57)   | 127.6(14) |
| C(53)-C(52)-C(58)   | 124.0(14) |
| C(57)-C(52)-C(58)   | 108.2(12) |
| C(52)-C(53)-C(54)   | 114.1(13) |
| C(52)-C(53)-H(53)   | 123.0     |
| C(54)-C(53)-H(53)   | 123.0     |
| C(55)-C(54)-C(53)   | 124.5(13) |
| C(55)-C(54)-H(54)   | 117.8     |
| C(53)-C(54)-H(54)   | 117.8     |
| C(56)-C(55)-C(54)   | 111.2(13) |
| C(56)-C(55)-H(55)   | 124.5     |
| C(54)-C(55)-H(55)   | 124.3     |
| C(57)-C(56)-C(55)   | 131.3(15) |
| C(57)-C(56)-H(56)   | 114.3     |
| C(55)-C(56)-H(56)   | 114.3     |
| C(56)-C(57)-C(52)   | 110.6(12) |
| C(56)-C(57)-H(57)   | 124.7     |
| C(52)-C(57)-H(57)   | 124.7     |
| C(52)-C(58)-H(58A)  | 110.6     |
| C(52)-C(58)-H(58B)  | 110.9     |
| H(58A)-C(58)-H(58B) | 108.3     |
| C(52)-C(58)-H(58C)  | 110.5     |
| H(58A)-C(58)-H(58C) | 108.3     |
| H(58B)-C(58)-H(58C) | 108.2     |

Table S7. Anisotropic displacement parameters ( $\text{Å}^2 \times 10^3$ ) for **3**. The anisotropic displacement factor exponent takes the form:  $-2 \pi^2 [ h^2 a^{*2} U_{11} + \dots + 2 h k a^* b^* U_{12} ]$

| U11 | U22 | U33 | U23 | U13 | U12 |
|-----|-----|-----|-----|-----|-----|
|-----|-----|-----|-----|-----|-----|

|       |         |        |         |        |        |        |
|-------|---------|--------|---------|--------|--------|--------|
| Sc(1) | 58(1)   | 49(1)  | 56(1)   | 3(1)   | 15(1)  | 7(1)   |
| N(1)  | 64(4)   | 62(3)  | 51(4)   | 6(3)   | 21(3)  | 9(3)   |
| N(2)  | 67(4)   | 69(4)  | 48(3)   | 15(3)  | 17(3)  | 17(3)  |
| N(3)  | 80(4)   | 57(3)  | 55(4)   | -2(3)  | 29(3)  | 7(3)   |
| N(4)  | 78(4)   | 69(4)  | 56(4)   | -12(3) | 19(3)  | 2(3)   |
| N(5)  | 117(5)  | 71(5)  | 90(5)   | -16(4) | -5(4)  | 2(4)   |
| N(6)  | 65(3)   | 43(3)  | 74(4)   | 0(3)   | 21(3)  | 10(3)  |
| C(1)  | 83(6)   | 146(8) | 97(6)   | 10(6)  | 31(5)  | -30(5) |
| C(2)  | 63(5)   | 76(5)  | 85(6)   | -4(4)  | 32(5)  | 3(4)   |
| C(3)  | 68(5)   | 86(5)  | 70(5)   | -8(4)  | 11(4)  | -8(4)  |
| C(4)  | 61(5)   | 83(5)  | 52(5)   | -1(4)  | 8(4)   | 10(4)  |
| C(5)  | 94(6)   | 119(7) | 71(6)   | 6(5)   | 0(5)   | 3(5)   |
| C(6)  | 86(6)   | 99(6)  | 73(5)   | 14(5)  | 13(5)  | 19(5)  |
| C(7)  | 111(6)  | 63(5)  | 65(5)   | 15(4)  | 38(5)  | 10(5)  |
| C(11) | 59(4)   | 68(5)  | 66(5)   | 13(4)  | 27(4)  | 7(3)   |
| C(12) | 51(4)   | 81(5)  | 61(5)   | 9(4)   | 14(4)  | 8(4)   |
| C(13) | 95(6)   | 97(6)  | 62(5)   | 3(5)   | 26(5)  | 1(5)   |
| C(14) | 99(6)   | 106(6) | 57(5)   | 8(5)   | 14(4)  | -7(5)  |
| C(15) | 89(6)   | 107(7) | 67(6)   | 40(5)  | 26(5)  | 14(5)  |
| C(16) | 78(5)   | 91(6)  | 73(6)   | 27(5)  | 35(4)  | 17(4)  |
| C(17) | 148(8)  | 103(7) | 92(6)   | 42(6)  | 58(6)  | 63(6)  |
| C(18) | 249(13) | 90(7)  | 181(11) | 22(7)  | 66(10) | 37(8)  |
| C(19) | 160(10) | 149(9) | 242(13) | 105(9) | 94(9)  | 84(8)  |
| C(20) | 67(5)   | 85(6)  | 76(5)   | 6(4)   | 27(4)  | 21(4)  |
| C(21) | 133(7)  | 85(6)  | 111(7)  | 4(5)   | 35(6)  | 32(5)  |
| C(22) | 92(7)   | 161(9) | 141(9)  | 50(7)  | 21(6)  | 36(6)  |
| C(31) | 86(5)   | 96(6)  | 94(6)   | -22(5) | 44(5)  | -30(5) |
| C(32) | 93(5)   | 81(5)  | 85(5)   | -5(5)  | 38(4)  | 5(4)   |
| C(33) | 101(6)  | 91(6)  | 64(5)   | 1(5)   | 29(4)  | 21(5)  |
| C(34) | 110(6)  | 67(5)  | 71(6)   | -14(5) | 18(5)  | 13(5)  |
| C(35) | 97(6)   | 61(5)  | 82(6)   | -8(4)  | 28(5)  | 14(4)  |
| C(36) | 90(6)   | 77(6)  | 85(6)   | 3(5)   | 11(5)  | 5(5)   |
| C(37) | 115(7)  | 70(5)  | 87(6)   | 7(5)   | 42(6)  | 11(5)  |
| C(38) | 115(7)  | 122(7) | 71(6)   | -11(5) | 0(5)   | 8(5)   |
| C(39) | 190(10) | 67(6)  | 161(10) | -29(6) | -35(8) | 16(6)  |
| C(40) | 65(4)   | 49(4)  | 61(4)   | 2(4)   | 26(3)  | 2(4)   |
| C(41) | 70(5)   | 48(4)  | 75(5)   | 1(4)   | 21(4)  | -2(4)  |
| C(42) | 94(6)   | 48(4)  | 95(6)   | -3(4)  | 30(5)  | -5(4)  |
| C(43) | 99(6)   | 55(5)  | 100(6)  | 4(4)   | 26(5)  | 16(4)  |
| C(44) | 71(5)   | 75(5)  | 80(5)   | 1(4)   | 12(4)  | 19(4)  |
| C(45) | 67(4)   | 51(4)  | 66(4)   | -1(3)  | 25(4)  | 12(3)  |
| C(46) | 72(5)   | 83(5)  | 79(6)   | -27(4) | 18(4)  | 13(4)  |
| C(47) | 134(7)  | 153(8) | 64(6)   | -33(6) | 11(5)  | -26(6) |
| C(48) | 102(6)  | 93(6)  | 107(7)  | -14(5) | 28(5)  | -17(5) |

|       |       |        |         |        |       |        |
|-------|-------|--------|---------|--------|-------|--------|
| C(49) | 84(6) | 68(5)  | 88(6)   | -10(4) | 19(5) | -4(4)  |
| C(50) | 93(7) | 169(9) | 128(9)  | 19(8)  | -4(6) | 3(6)   |
| C(51) | 95(7) | 130(8) | 225(12) | 13(8)  | 57(7) | -39(6) |

---

Table S8. Torsion angles [deg] for **3**.

---

|                       |           |
|-----------------------|-----------|
| N(6)-Sc(1)-N(1)-C(2)  | -85.2(5)  |
| N(2)-Sc(1)-N(1)-C(2)  | 35.1(5)   |
| N(4)-Sc(1)-N(1)-C(2)  | 162.1(5)  |
| N(3)-Sc(1)-N(1)-C(2)  | 65.8(7)   |
| N(6)-Sc(1)-N(1)-C(11) | 85.5(5)   |
| N(2)-Sc(1)-N(1)-C(11) | -154.2(5) |
| N(4)-Sc(1)-N(1)-C(11) | -27.2(5)  |
| N(3)-Sc(1)-N(1)-C(11) | -123.5(5) |
| N(6)-Sc(1)-N(2)-C(4)  | 68.3(5)   |
| N(1)-Sc(1)-N(2)-C(4)  | -36.8(5)  |
| N(4)-Sc(1)-N(2)-C(4)  | -126.6(5) |
| N(3)-Sc(1)-N(2)-C(4)  | 156.4(5)  |
| N(6)-Sc(1)-N(2)-C(6)  | -96.1(5)  |
| N(1)-Sc(1)-N(2)-C(6)  | 158.8(5)  |
| N(4)-Sc(1)-N(2)-C(6)  | 69.0(5)   |
| N(3)-Sc(1)-N(2)-C(6)  | -8.0(5)   |
| N(6)-Sc(1)-N(3)-C(31) | -87.1(5)  |
| N(2)-Sc(1)-N(3)-C(31) | 152.5(5)  |
| N(1)-Sc(1)-N(3)-C(31) | 120.8(6)  |
| N(4)-Sc(1)-N(3)-C(31) | 23.4(5)   |
| N(6)-Sc(1)-N(3)-C(32) | 34.4(4)   |
| N(2)-Sc(1)-N(3)-C(32) | -86.0(4)  |
| N(1)-Sc(1)-N(3)-C(32) | -117.7(5) |
| N(4)-Sc(1)-N(3)-C(32) | 144.9(4)  |
| N(6)-Sc(1)-N(3)-C(7)  | 150.8(4)  |
| N(2)-Sc(1)-N(3)-C(7)  | 30.4(4)   |
| N(1)-Sc(1)-N(3)-C(7)  | -1.3(7)   |
| N(4)-Sc(1)-N(3)-C(7)  | -98.7(4)  |
| N(6)-Sc(1)-N(4)-C(37) | -17.2(6)  |
| N(2)-Sc(1)-N(4)-C(37) | 176.4(5)  |
| N(1)-Sc(1)-N(4)-C(37) | 91.8(5)   |
| N(3)-Sc(1)-N(4)-C(37) | -113.7(5) |
| N(6)-Sc(1)-N(4)-C(33) | 151.3(5)  |
| N(2)-Sc(1)-N(4)-C(33) | -15.1(6)  |
| N(1)-Sc(1)-N(4)-C(33) | -99.7(5)  |
| N(3)-Sc(1)-N(4)-C(33) | 54.8(6)   |

|                         |           |
|-------------------------|-----------|
| N(2)-Sc(1)-N(6)-C(40)   | -13(3)    |
| N(1)-Sc(1)-N(6)-C(40)   | 79(2)     |
| N(4)-Sc(1)-N(6)-C(40)   | 179(9)    |
| N(3)-Sc(1)-N(6)-C(40)   | -89(2)    |
| C(11)-N(1)-C(2)-C(3)    | 168.8(6)  |
| Sc(1)-N(1)-C(2)-C(3)    | -20.4(9)  |
| C(11)-N(1)-C(2)-C(1)    | -11.9(9)  |
| Sc(1)-N(1)-C(2)-C(1)    | 158.9(5)  |
| N(1)-C(2)-C(3)-C(4)     | -11.2(12) |
| C(1)-C(2)-C(3)-C(4)     | 169.4(7)  |
| C(6)-N(2)-C(4)-C(3)     | -172.4(6) |
| Sc(1)-N(2)-C(4)-C(3)    | 23.1(9)   |
| C(6)-N(2)-C(4)-C(5)     | 6.0(9)    |
| Sc(1)-N(2)-C(4)-C(5)    | -158.5(5) |
| C(2)-C(3)-C(4)-N(2)     | 10.1(12)  |
| C(2)-C(3)-C(4)-C(5)     | -168.4(7) |
| C(4)-N(2)-C(6)-C(7)     | 177.9(6)  |
| Sc(1)-N(2)-C(6)-C(7)    | -16.7(7)  |
| C(31)-N(3)-C(7)-C(6)    | -178.8(5) |
| C(32)-N(3)-C(7)-C(6)    | 63.0(7)   |
| Sc(1)-N(3)-C(7)-C(6)    | -49.5(6)  |
| N(2)-C(6)-C(7)-N(3)     | 46.5(8)   |
| C(2)-N(1)-C(11)-C(16)   | 93.2(7)   |
| Sc(1)-N(1)-C(11)-C(16)  | -77.9(7)  |
| C(2)-N(1)-C(11)-C(12)   | -90.1(7)  |
| Sc(1)-N(1)-C(11)-C(12)  | 98.8(6)   |
| C(16)-C(11)-C(12)-C(13) | -2.0(10)  |
| N(1)-C(11)-C(12)-C(13)  | -178.7(6) |
| C(16)-C(11)-C(12)-C(20) | -178.6(6) |
| N(1)-C(11)-C(12)-C(20)  | 4.7(9)    |
| C(11)-C(12)-C(13)-C(14) | 2.7(11)   |
| C(20)-C(12)-C(13)-C(14) | 179.3(6)  |
| C(12)-C(13)-C(14)-C(15) | -2.1(11)  |
| C(13)-C(14)-C(15)-C(16) | 0.8(12)   |
| C(14)-C(15)-C(16)-C(11) | -0.2(11)  |
| C(14)-C(15)-C(16)-C(17) | -177.6(7) |
| C(12)-C(11)-C(16)-C(15) | 0.8(10)   |
| N(1)-C(11)-C(16)-C(15)  | 177.4(6)  |
| C(12)-C(11)-C(16)-C(17) | 178.1(7)  |
| N(1)-C(11)-C(16)-C(17)  | -5.2(10)  |
| C(15)-C(16)-C(17)-C(19) | -59.6(9)  |
| C(11)-C(16)-C(17)-C(19) | 123.1(8)  |
| C(15)-C(16)-C(17)-C(18) | 63.7(11)  |
| C(11)-C(16)-C(17)-C(18) | -113.5(8) |

|                         |           |
|-------------------------|-----------|
| C(13)-C(12)-C(20)-C(22) | -80.0(9)  |
| C(11)-C(12)-C(20)-C(22) | 96.6(8)   |
| C(13)-C(12)-C(20)-C(21) | 43.4(9)   |
| C(11)-C(12)-C(20)-C(21) | -140.0(6) |
| C(37)-N(4)-C(33)-C(34)  | 2.2(10)   |
| Sc(1)-N(4)-C(33)-C(34)  | -167.1(5) |
| N(4)-C(33)-C(34)-C(35)  | -0.5(12)  |
| C(39)-N(5)-C(35)-C(36)  | 175.0(8)  |
| C(38)-N(5)-C(35)-C(36)  | -0.7(12)  |
| C(39)-N(5)-C(35)-C(34)  | -6.6(12)  |
| C(38)-N(5)-C(35)-C(34)  | 177.7(7)  |
| C(33)-C(34)-C(35)-N(5)  | 179.1(7)  |
| C(33)-C(34)-C(35)-C(36) | -2.5(11)  |
| N(5)-C(35)-C(36)-C(37)  | -177.8(7) |
| C(34)-C(35)-C(36)-C(37) | 3.7(11)   |
| C(33)-N(4)-C(37)-C(36)  | -0.8(11)  |
| Sc(1)-N(4)-C(37)-C(36)  | 168.9(6)  |
| C(35)-C(36)-C(37)-N(4)  | -2.2(12)  |
| Sc(1)-N(6)-C(40)-C(41)  | -22(3)    |
| Sc(1)-N(6)-C(40)-C(45)  | 158(2)    |
| N(6)-C(40)-C(41)-C(42)  | 178.8(6)  |
| C(45)-C(40)-C(41)-C(42) | -1.6(9)   |
| N(6)-C(40)-C(41)-C(49)  | 0.6(9)    |
| C(45)-C(40)-C(41)-C(49) | -179.9(6) |
| C(40)-C(41)-C(42)-C(43) | 0.4(11)   |
| C(49)-C(41)-C(42)-C(43) | 178.6(7)  |
| C(41)-C(42)-C(43)-C(44) | 0.3(11)   |
| C(42)-C(43)-C(44)-C(45) | 0.2(11)   |
| C(43)-C(44)-C(45)-C(40) | -1.5(10)  |
| C(43)-C(44)-C(45)-C(46) | -178.2(7) |
| N(6)-C(40)-C(45)-C(44)  | -178.3(6) |
| C(41)-C(40)-C(45)-C(44) | 2.1(9)    |
| N(6)-C(40)-C(45)-C(46)  | -1.7(9)   |
| C(41)-C(40)-C(45)-C(46) | 178.8(6)  |
| C(44)-C(45)-C(46)-C(47) | -55.4(9)  |
| C(40)-C(45)-C(46)-C(47) | 128.0(7)  |
| C(44)-C(45)-C(46)-C(48) | 69.7(8)   |
| C(40)-C(45)-C(46)-C(48) | -106.9(7) |
| C(42)-C(41)-C(49)-C(50) | -78.7(9)  |
| C(40)-C(41)-C(49)-C(50) | 99.5(8)   |
| C(42)-C(41)-C(49)-C(51) | 47.3(10)  |
| C(40)-C(41)-C(49)-C(51) | -134.5(7) |
| C(57)-C(52)-C(53)-C(54) | 4(3)      |
| C(58)-C(52)-C(53)-C(54) | 178.3(17) |



|                         |           |
|-------------------------|-----------|
| C(52)-C(53)-C(54)-C(55) | -1(2)     |
| C(53)-C(54)-C(55)-C(56) | 2(2)      |
| C(54)-C(55)-C(56)-C(57) | -7(3)     |
| C(55)-C(56)-C(57)-C(52) | 10(3)     |
| C(53)-C(52)-C(57)-C(56) | -8(3)     |
| C(58)-C(52)-C(57)-C(56) | 177.1(16) |

---





***Calculated total energies and geometrical coordinates calculated at  
B3LYP/6-311G\*/Lanl2DZ level:***

**2**

E(RB+HF-LYP) = -1594.67391779 Hartree

Sc,0,0.1801800247,0.7765296504,-0.746946193  
N,0,1.7065364523,-0.2238105687,0.5474413787  
N,0,1.0026437415,2.6104157864,0.1934372009  
N,0,-0.7417899958,2.6921365458,-1.9780423709  
N,0,-1.6614165447,-0.0949599565,-0.4592647253  
C,0,2.7363710505,-0.6864150498,2.7471559068  
C,0,2.0131109209,0.2183533898,1.7667499467  
C,0,1.7427628022,1.5252381739,2.2224095333  
C,0,1.4048305266,2.6579840711,1.4656649128  
C,0,1.552452824,3.9961022807,2.1657419594  
C,0,0.8975038445,3.8761032074,-0.5349456158  
C,0,0.4038860797,3.6250016051,-1.9540211289  
C,0,2.3945341226,-1.4039366534,0.0787245649  
C,0,3.6837876832,-1.2449770029,-0.4896984013  
C,0,4.3650874604,-2.379638241,-0.9346342288  
C,0,3.8009436404,-3.6455046299,-0.840996038  
C,0,2.5284106391,-3.7852600555,-0.3073312447  
C,0,1.801600839,-2.6832495574,0.1565740233  
C,0,4.3498337594,0.1216929769,-0.6473501014  
C,0,5.6151135525,0.2578089604,0.2203209663  
C,0,4.6797272619,0.4271378739,-2.1204137871  
C,0,0.3976631091,-2.9149111952,0.7067999558  
C,0,0.3930085553,-3.8144199271,1.9570529575  
C,0,-0.5288004431,-3.5089673824,-0.3698022967  
C,0,-1.9005190849,3.2295922662,-1.2384286015  
C,0,-1.1412228419,2.4368249157,-3.3728464592  
C,0,0.8364522676,-0.0500082364,-2.7161600569  
C,0,-2.8429059946,-0.3540168534,0.2315108025  
C,0,-3.0124365098,0.103720398,1.568447596  
C,0,-4.2179275659,-0.1292603569,2.2312188858  
C,0,-5.2674673101,-0.8113120897,1.6318785273  
C,0,-5.0974858904,-1.2869866714,0.3367755863  
C,0,-3.9167799103,-1.0831684412,-0.3757880239  
C,0,-1.9007451244,0.819654321,2.3233447942  
C,0,-1.4019814583,-0.0120903601,3.5187002024  
C,0,-2.3100558161,2.2302559766,2.7814359101

C,0,-3.8121899766,-1.6015762091,-1.8100039401  
C,0,-4.587422887,-2.9032605953,-2.0689745773  
C,0,-4.2398773983,-0.5203496398,-2.8218113127  
H,0,-1.7016537717,-0.5708487037,-1.3615707022  
H,0,2.1733751429,-1.6073639212,2.9089565446  
H,0,2.8790877566,-0.1942151439,3.7083682437  
H,0,3.7143543694,-0.98646881,2.3671116383  
H,0,1.989868081,1.7155407732,3.2581620742  
H,0,2.3204227965,4.6109834252,1.6863806813  
H,0,1.8360960045,3.866349312,3.2088003832  
H,0,0.6219647557,4.5709971296,2.1366151382  
H,0,1.8679794797,4.3849206312,-0.6029653991  
H,0,0.2235154303,4.5789847054,-0.0302192301  
H,0,0.1410367753,4.5819781859,-2.4316631235  
H,0,1.1996188951,3.1703112525,-2.5502694346  
H,0,5.355604276,-2.2707533209,-1.3654140028  
H,0,4.3473185779,-4.5163538009,-1.1899211124  
H,0,2.0854698168,-4.7742178556,-0.2463926989  
H,0,3.6397916432,0.8792527761,-0.3119326328  
H,0,5.3999491322,0.1124194588,1.2814222422  
H,0,6.0539332426,1.2541488188,0.1062126861  
H,0,6.3787477527,-0.4721683673,-0.0648246303  
H,0,5.0650163246,1.4471310454,-2.2208416834  
H,0,3.7961434584,0.3320202719,-2.7536620542  
H,0,5.4441517843,-0.2490787125,-2.5144685258  
H,0,-0.0190252264,-1.9469750763,0.9895503597  
H,0,0.7570152021,-4.8210603153,1.7307568841  
H,0,-0.6227185146,-3.9132183288,2.3512248053  
H,0,1.0215659334,-3.4132266307,2.7558005728  
H,0,-0.5154087507,-2.9062862781,-1.2799107692  
H,0,-1.5588160913,-3.5522268045,-0.0059101666  
H,0,-0.2280445543,-4.5248981608,-0.6429563292  
H,0,-2.2232026956,4.196142979,-1.6525439845  
H,0,-1.6575949922,3.3621232087,-0.1855393053  
H,0,-2.7237814819,2.5201150047,-1.2990668503  
H,0,-1.5100888807,3.3561961756,-3.8505868458  
H,0,-1.9345766238,1.6908953225,-3.3974735145  
H,0,-0.2954991068,2.0563954892,-3.9409365337  
H,0,1.4080907411,-0.9750373267,-2.5716387705  
H,0,1.49385276,0.626422857,-3.2828577128  
H,0,0.0080276871,-0.3045857524,-3.3926355491  
H,0,-4.3360906224,0.2274827607,3.2506613755  
H,0,-6.1969708564,-0.9804457294,2.1660292148  
H,0,-5.91076604,-1.8338500013,-0.1281724433

H,0,-1.0506558401,0.9381983439,1.6478577342  
H,0,-2.1960020762,-0.163260126,4.2558051423  
H,0,-0.5681623321,0.4871341379,4.0204409324  
H,0,-1.0613713013,-0.9990632089,3.1967126256  
H,0,-2.6775639861,2.832113288,1.9460313709  
H,0,-1.4606495601,2.7521478262,3.2338265186  
H,0,-3.1075755194,2.1944115125,3.5290303257  
H,0,-2.7638075,-1.8494859564,-2.0145218077  
H,0,-4.3398434981,-3.6709483198,-1.3319973956  
H,0,-4.3405551445,-3.2949904088,-3.0600927456  
H,0,-5.6702348069,-2.7530841016,-2.0467819909  
H,0,-5.3013784053,-0.2840344223,-2.702165582  
H,0,-4.0816814034,-0.8522931572,-3.8533676298  
H,0,-3.6809968467,0.4068215652,-2.6747416538

### 3

E(RB+HF-LYP) = -1936.50616089 Hartree

Sc,0,-0.3985818385,-0.1846977742,0.9327761189  
N,0,-0.0219663707,-2.0652236731,-0.3224310326  
N,0,-1.0979618224,-1.6777147052,2.4615438641  
N,0,-0.4886409955,0.9992795115,3.1208225412  
N,0,1.7458844164,0.7426357949,0.6278423433  
N,0,5.4668295438,2.6180014505,0.0425446666  
N,0,-1.5973728651,0.9367619726,0.0715199088  
C,0,-0.9266878161,-4.1248006232,-1.373504147  
C,0,-0.8434265214,-3.1075645019,-0.2454119317  
C,0,-1.7123215832,-3.3660876854,0.8374227014  
C,0,-1.7634051485,-2.7802024615,2.1123484512  
C,0,-2.6250741467,-3.499717074,3.1352266191  
C,0,-1.1074949506,-1.2939767569,3.8707108105  
C,0,-0.2190003329,-0.0755642102,4.0961612174  
C,0,0.9991803214,-2.039819472,-1.3323401164  
C,0,2.278386596,-2.566478004,-1.0098949561  
C,0,3.2972604132,-2.4909172575,-1.961581806  
C,0,3.0829347205,-1.9078807666,-3.2052215624  
C,0,1.8287879528,-1.4031638075,-3.5136264546  
C,0,0.7674794322,-1.4625184576,-2.6026795527  
C,0,-0.6001030484,-0.9439074188,-3.0404501881  
C,0,-1.1438490635,-1.7367199562,-4.2456091735  
C,0,-0.5771754301,0.5578692534,-3.3686573511  
C,0,2.5446584514,-3.2417770964,0.3352569312  
C,0,3.9734084667,-3.0224523749,0.8626784736

C,0,2.2546691208,-4.7554832916,0.2839928764  
C,0,0.4457490252,2.1161861236,3.325733081  
C,0,-1.8697198719,1.5076386318,3.2556091348  
C,0,2.834490329,0.4055694368,1.3417000428  
C,0,4.0761996637,0.989266921,1.1964016194  
C,0,4.2628417205,2.0079975723,0.2296010127  
C,0,3.1185931041,2.3498304273,-0.5293732927  
C,0,1.9195218037,1.7083439255,-0.2969549344  
C,0,5.6130940276,3.6495910902,-0.9766047656  
C,0,6.6231418258,2.2166739904,0.8315642559  
C,0,-2.640738369,1.634758669,-0.4582177913  
C,0,-3.8766173851,0.9871296371,-0.8189156178  
C,0,-4.9215195085,1.7232986269,-1.370909963  
C,0,-4.8239107038,3.0950433272,-1.5937519696  
C,0,-3.6448419009,3.7404873928,-1.2386711829  
C,0,-2.5673751832,3.0551966214,-0.6793706012  
C,0,-1.3112761675,3.8293807117,-0.3048062016  
C,0,-0.5795353249,4.3855041855,-1.5403299073  
C,0,-1.5855262833,4.9599621274,0.7031041104  
C,0,-4.0589557814,-0.4982463277,-0.5444309776  
C,0,-4.7949429254,-0.7249919578,0.7891356367  
C,0,-4.7577106126,-1.2663365801,-1.6770094201  
H,0,-1.7215271437,-3.8277892102,-2.0648282711  
H,0,-1.179201007,-5.1159617143,-0.994956252  
H,0,-0.004737432,-4.1932081035,-1.9477341704  
H,0,-2.3549942824,-4.226936347,0.7025302723  
H,0,-2.019816265,-3.8985102711,3.9557880024  
H,0,-3.1611191078,-4.3337065938,2.6850075952  
H,0,-3.362461813,-2.8262465883,3.5817413809  
H,0,-0.728956215,-2.0965056083,4.5187009706  
H,0,-2.1221710792,-1.0760443246,4.2286635766  
H,0,-0.3458687346,0.289367443,5.1289303859  
H,0,0.8316025965,-0.364455083,3.9845074158  
H,0,4.2775216089,-2.8937552055,-1.7300091063  
H,0,3.8886469417,-1.8568274856,-3.9316080573  
H,0,1.6604005514,-0.9615371332,-4.4908471845  
H,0,-1.2917742514,-1.0729079063,-2.2070643833  
H,0,-0.5409544898,-1.5676238117,-5.1432017421  
H,0,-2.1663611486,-1.4232058712,-4.4751537391  
H,0,-1.1560794092,-2.812920647,-4.0594407312  
H,0,-0.3005326316,1.1405901761,-2.4904599508  
H,0,-1.5699276536,0.8969875838,-3.6746450748  
H,0,0.1217990322,0.78578687,-4.1801239964  
H,0,1.8463232959,-2.8069973322,1.0565975125

H,0,4.7102599266,-3.6078312503,0.3047711524  
H,0,4.0425063563,-3.3442446908,1.9066689043  
H,0,4.2757704282,-1.9748113871,0.8064889053  
H,0,1.2159062197,-4.9656795493,0.030729051  
H,0,2.4584469198,-5.2196665171,1.2544783916  
H,0,2.8884436225,-5.24644312,-0.4614614859  
H,0,0.2919164257,2.5911587454,4.3063737082  
H,0,0.2949134989,2.8653059957,2.5487227469  
H,0,1.4762921498,1.765671847,3.2710768737  
H,0,-2.5905263285,0.7284926676,3.0202536412  
H,0,-2.0270577486,2.3129100555,2.5431005799  
H,0,-2.0524145352,1.8757755881,4.2773960461  
H,0,2.7017055744,-0.3850798773,2.0739757086  
H,0,4.888079963,0.6444682304,1.8216844342  
H,0,3.1533027453,3.1081124307,-1.2989911097  
H,0,1.0386291451,1.970550655,-0.867294118  
H,0,5.4054925423,3.2611264355,-1.9792542476  
H,0,6.6350063519,4.0219833487,-0.9653236125  
H,0,4.9448661126,4.4963522105,-0.7900107075  
H,0,6.4564834828,2.3758642958,1.9022964777  
H,0,7.4830885208,2.8136716979,0.5364942125  
H,0,6.8758030449,1.1624092781,0.6746732872  
H,0,-5.8460782621,1.2158381477,-1.6346261135  
H,0,-5.6510921876,3.6471233284,-2.0297509512  
H,0,-3.5629988679,4.8132360608,-1.4022677842  
H,0,-0.6500900157,3.1062677322,0.179595229  
H,0,-0.3548176852,3.5936466445,-2.2598418628  
H,0,0.3626342509,4.8735999804,-1.2605665181  
H,0,-1.1895826573,5.1284938753,-2.0636513114  
H,0,-2.2273148498,5.7370618616,0.2771663033  
H,0,-0.6535567584,5.4448438254,1.0179160648  
H,0,-2.0893900502,4.5829904495,1.5975521891  
H,0,-3.0573822494,-0.9195013507,-0.4305601103  
H,0,-4.2763330522,-0.2191632975,1.6075886197  
H,0,-4.8555461476,-1.7917915214,1.0333531828  
H,0,-5.8146405497,-0.3279420652,0.747546375  
H,0,-4.7449459849,-2.3425808049,-1.4736087447  
H,0,-4.2628441003,-1.0987721081,-2.6375882662  
H,0,-5.8065650221,-0.9757494184,-1.7933411691



To confirm the reliability of the method used in the calculation, the structures of **2** and **3** were fully optimized using the methods and basis sets listed in Table S9. These methods gave similar results, which are consistent well with the experimental values (bond lengths (Å) and bond angle (°)). Fig S3 and Fig S4 show the HOMO and HOMO-1 of **2** and **3**, respectively (calculated at BP86/6-311G\*\*/SDD level), they are similar to those calculated at B3LYP/6-311G\*/Lanl2DZ level. Therefore, the calculation results are not sensitive to the selection of basis sets (Lanl2DZ vs. SDD, 6-311G\* vs. 6-311G\*\*) and the exchange-correlation functional (B3LYP vs. BP86).<sup>8</sup>

Table S9. Selected bond lengths (Å) and bond angles (°) of **2** and **3**.

| Complex <b>2</b>       | C40-N4 | N4-Sc | C40-N4-Sc | N4-H  |
|------------------------|--------|-------|-----------|-------|
| B3LYP/Lanl2DZ/6-311G*  | 1.393  | 2.058 | 155.1     | 1.021 |
| B3LYP/Lanl2DZ/6-311G** | 1.394  | 2.057 | 155.2     | 1.021 |
| B3LYP/SDD/6-311G*      | 1.394  | 2.060 | 155.3     | 1.021 |
| B3LYP/SDD/6-311G**     | 1.394  | 2.058 | 155.8     | 1.021 |
| BP86/SDD/6-311G*       | 1.397  | 2.062 | 155.0     | 1.033 |
| BP86/SDD/6-311G**      | 1.397  | 2.059 | 155.4     | 1.033 |
| Exp.                   | 1.391  | 2.047 | 153.7     |       |

  

| Complex <b>3</b>       | C40-N6 | N6-Sc | C40-N6-Sc |
|------------------------|--------|-------|-----------|
| B3LYP/Lanl2DZ/6-311G*  | 1.362  | 1.854 | 170.3     |
| B3LYP/Lanl2DZ/6-311G** | 1.363  | 1.855 | 169.2     |
| B3LYP/SDD/6-311G*      | 1.362  | 1.853 | 168.8     |
| B3LYP/SDD/6-311G**     | 1.362  | 1.854 | 168.7     |
| BP86/SDD/6-311G*       | 1.365  | 1.863 | 167.8     |
| BP86/SDD/6-311G**      | 1.365  | 1.864 | 167.8     |
| Exp.                   | 1.357  | 1.881 | 169.6     |

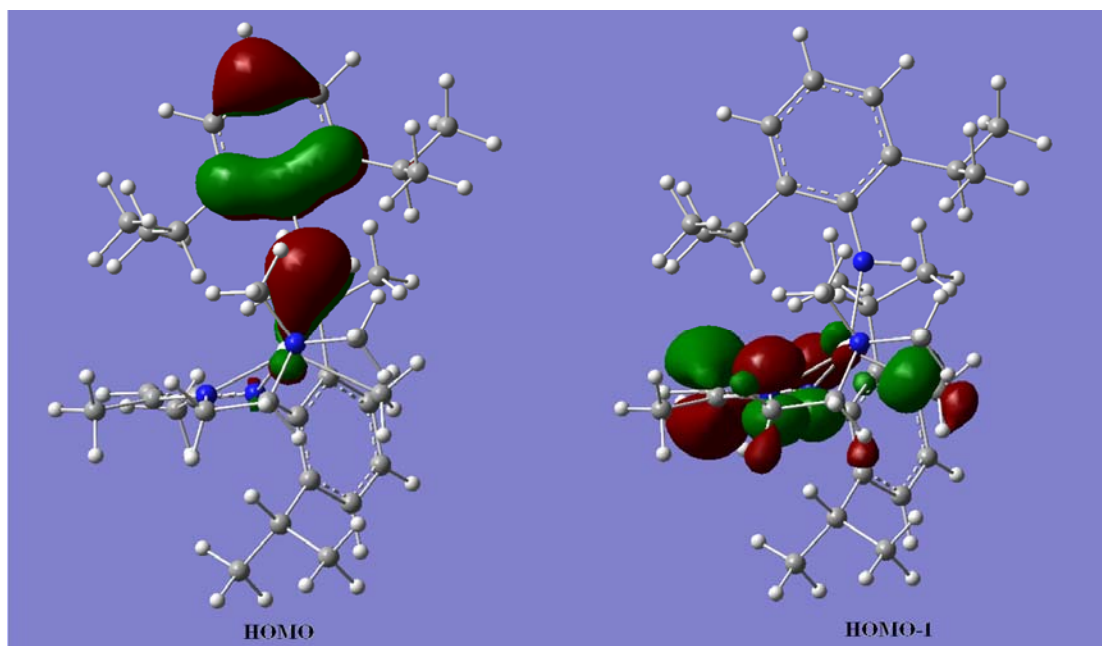

**Fig. S3.** HOMO and HOMO-1 of **2**. Calculated at BP86/6-311G\*\*/SDD level.

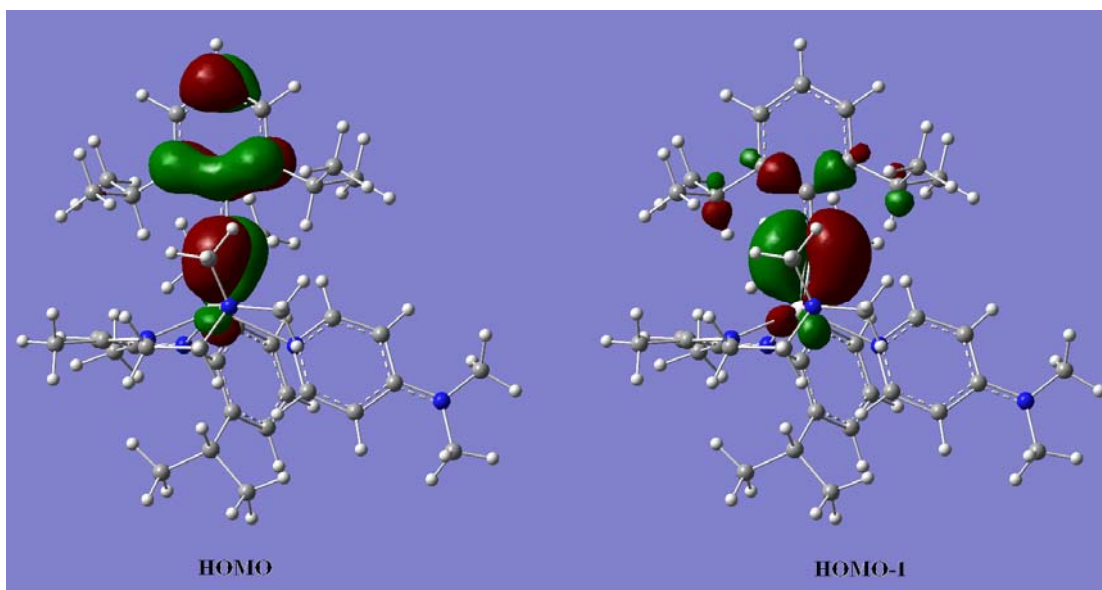

**Fig. S4.** HOMO and HOMO-1 of **3**. Calculated at BP86/6-311G\*\*/SDD level.

***Calculated total energies and geometrical coordinates at BP86/6-311G\*\*/SDD level:***

**2**

E(RB-P86) = -1595.02653535 Hartree

Sc,0.1863558784,0.770665171,-0.76087173 87  
N,1.7035618807,-0.2181981237,0.5474879435  
N,1.0061729666,2.60974022 95,0.1766370077  
N,-0.7517464902,2.6734320003,-1.9769890701  
N,-1.654325 7444,-0.1012128392,-0.4597524571  
C,2.7384648992,-0.6827113612,2.756347 228  
C,2.0105653866,0.2244903216,1.7791619811  
C,1.7354711503,1.53793240 98,2.2305374102  
C,1.4018215557,2.6729620174,1.4613034081  
C,1.548723966 2,4.0205085415,2.1489015205  
C,0.9021348449,3.8769643897,-0.5599904862  
C,0.3962886978,3.6143534396,-1.9779105296  
C,2.394230655,-1.4002738161, 0.0823263847  
C,3.6973632245,-1.244207284,-0.4748223565  
C,4.3788997245, -2.3860545227,-0.9257411685  
C,3.8029393218,-3.6563389648,-0.846387176  
C,2.5170429188,-3.7930176307,-0.3220462561  
C,1.788787817,-2.6836841815 ,0.1453081972  
C,4.3692530592,0.1240097334,-0.617047096  
C,5.6481725438, 0.2357651771,0.2423897864  
C,4.6888575023,0.4439238705,-2.0943867573  
C, 0.3773491086,-2.9057909974,0.6871346945  
C,0.3646701534,-3.8048882761,1 .9432813839  
C,-0.5439146214,-3.5021319324,-0.3990467223  
C,-1.902829419 4,3.2160774372,-1.2163576289  
C,-1.1757267892,2.4162001906,-3.371018278 1  
C,0.8588783033,-0.0429421984,-2.7309691749  
C,-2.8387986348,-0.359995 0933,0.2334425628  
C,-3.005361896,0.1012020834,1.5783978521  
C,-4.215159 8314,-0.1337901481,2.2484020823  
C,-5.2719156685,-0.8220438266,1.648713 401  
C,-5.1049155649,-1.3003944329,0.345352186  
C,-3.9201817318,-1.09284 25664,-0.3742252244  
C,-1.8874514659,0.8199031512,2.3270335475  
C,-1.387 0691529,-0.0109175843,3.5282959549  
C,-2.2987395687,2.2356982226,2.7824 161252

C,-3.8147142705,-1.6016180132,-1.8138255105  
C,-4.5886872667,-2.9077789172,-2.079382919  
C,-4.251140778,-0.5079464136,-2.8162322356  
H,-1.6984509347,-0.5918636096,-1.367702976  
H,2.2177793861,-1.6474391229,2.8546202911  
H,2.8143250544,-0.2142909814,3.7466537809  
H,3.7552312821,-0.9129383857,2.4010870656  
H,1.9811670372,1.7349077577,3.2747734051  
H,2.3333909707,4.6284453514,1.6668319949  
H,1.8206494141,3.8952226618,3.2047637622  
H,0.6147198199,4.6055320357,2.0985205637  
H,1.8813867188,4.3883641898,-0.6364371319  
H,0.2240872867,4.5891498346,-0.0511197727  
H,0.1216038147,4.5744671886,-2.4651800803  
H,1.1905605522,3.145895949,-2.5833501155  
H,5.3812008085,-2.2754076342,-1.3502880775  
H,4.3511647438,-4.5341195396,-1.1991712053  
H,2.0616289392,-4.7863057919,-0.2696602833  
H,3.6554869021,0.8835494577,-0.2606558194  
H,5.4409677524,0.064804873,1.3102815883  
H,6.0939022383,1.2398187618,0.1429964183  
H,6.4074616356,-0.4995452031,-0.0732273514  
H,5.0986425621,1.4641241193,-2.1862468064  
H,3.7874581093,0.3721176179,-2.7209992315  
H,5.4394198964,-0.2527212677,-2.5040066233  
H,-0.037856465,-1.9231433163,0.9638018723  
H,0.7447141667,-4.8152242226,1.7162448139  
H,-0.663112778,-3.9120159954,2.327307984  
H,0.9866318914,-3.3921207489,2.7534445243  
H,-0.5217588318,-2.8916363447,-1.3147809889  
H,-1.5837291803,-3.5469508331,-0.0373673359  
H,-0.2336820886,-4.5251206372,-0.6711496033  
H,-2.2361362671,4.1883790194,-1.634474501  
H,-1.6343748518,3.3527560329,-0.1596887594  
H,-2.7296814306,2.4945109107,-1.2595541324  
H,-1.5503719982,3.3456302575,-3.847309689  
H,-1.9795615514,1.6670671464,-3.3780259708  
H,-0.3299057846,2.0258160587,-3.9511726924  
H,1.4583158697,-0.9590940306,-2.57334952  
H,1.505465687,0.6588076043,-3.2964733348  
H,0.0302298178,-0.3212374419,-3.4115915845  
H,-4.3286609031,0.227217216,3.2760431143  
H,-6.2060059398,-0.9932612144,2.1894949043  
H,-5.9232313919,-1.8527471265,-0.1242450055

H,-1.0317473166,0.93304 95782,1.639031383  
H,-2.1922687558,-0.1598709405,4.2670827595  
H,-0.5485 848883,0.4969061584,4.0325223488  
H,-1.0430906856,-1.0056374272,3.20508 50441  
H,-2.6714304821,2.8381838361,1.9386474341  
H,-1.4428987067,2.7616 09638,3.2384182333  
H,-3.1035443949,2.1936828844,3.5351495386  
H,-2.7535 128618,-1.84203729,-2.0197850384  
H,-4.3228450204,-3.688279677,-1.34971 25408  
H,-4.3566241425,-3.2862715875,-3.0883571459  
H,-5.679592272,-2.75 58627457,-2.0331871452  
H,-5.3229184953,-0.2823646055,-2.6886354162  
H,- 4.0880974197,-0.8280573157,-3.8595903888  
H,-3.694545387,0.4281718763,- 2.6505332375

### 3

E(RB-P86) = -1936.86659171 Hartree

Sc,-0.3796118985,-0.2175998476,0.9149364766  
N,- 0.017685681,-2.0976541295,-0.3179582737  
N,-1.1109748096,-1.6969691787, 2.4443223855  
N,-0.5127559794,0.9805402166,3.0631602738  
N,1.7418945687, 0.7174256364,0.6191083456  
N,5.459793941,2.6311577911,-0.009715504  
N,-1 .5647582691,0.933105656,0.0504644874  
C,-0.9051494315,-4.1553546144,-1. 3988568505  
C,-0.8490423446,-3.1495216493,-0.2574358498  
C,-1.7267623411 ,-3.406904797,0.8246541359  
C,-1.7822823478,-2.8114451233,2.1038592622  
C,-2.6407819914,-3.5267300304,3.1359187557  
C,-1.1356206599,-1.29940657 58,3.8556901566  
C,-0.2482807615,-0.0727608531,4.0727468455  
C,1.0093252 905,-2.0668841591,-1.3237529809  
C,2.3078011931,-2.5531113425,-0.978473 2633  
C,3.3395093827,-2.4585017827,-1.9260241395  
C,3.1193335892,-1.8934 151408,-3.1861717258  
C,1.8466856953,-1.4274239921,-3.5158066723  
C,0.77 17340537,-1.5102555525,-2.6110348245  
C,-0.608103515,-1.0310517013,-3.0 642136012  
C,-1.0811468068,-1.7896997322,-4.3258352131  
C,-0.638541902,0 .4909301045,-3.3151068584  
C,2.5723701651,-3.1934037342,0.3871136892  
C, 4.0185741591,-3.0035498801,0.8876286142

C,2.2285643222,-4.7021871193,0.3945320098  
C,0.4088401941,2.1169193397,3.2649763217  
C,-1.9084383518,1.4764664716,3.1636599443  
C,2.8456207302,0.3961030712,1.3358615896  
C,4.0875848874,0.9943894958,1.1762212418  
C,4.2576280318,2.0088196903,0.191098009  
C,3.10129876,2.3343706509,-0.570965515  
C,1.9018787922,1.682534969,-0.3236650911  
C,5.5911570449,3.6556567481,-1.0453930162  
C,6.62786338,2.2485960657,0.7809723234  
C,-2.6296572459,1.6562516737,-0.4044440219  
C,-3.8965938698,1.0298411425,-0.7256464109  
C,-4.9698208396,1.797976468,-1.192090591  
C,-4.8736247544,3.1853675608,-1.3639893899  
C,-3.6630425081,3.812227317,-1.0488754565  
C,-2.556222137,3.0934067298,-0.5774838314  
C,-1.2618595639,3.8355855875,-0.2596710236  
C,-0.5628850519,4.3400234841,-1.5411669514  
C,-1.460518614,4.9986245684,0.7349581595  
C,-4.0752582902,-0.4697061919,-0.5195730565  
C,-4.9421261519,-0.765385339,0.7236674819  
C,-4.6438776689,-1.1916552325,-1.7573305957  
H,-1.5791353629,-3.7787735852,-2.1869430822  
H,-1.2964295437,-5.1240320227,-1.0579304585  
H,0.0797422898,-4.3068291182,-1.8625823537  
H,-2.3740117272,-4.2751892237,0.6912707323  
H,-2.0244809099,-3.92582189,3.9603248108  
H,-3.1824455246,-4.3676072951,2.683982067  
H,-3.3792932757,-2.844094652,3.5888303227  
H,-0.7627642931,-2.1021451187,4.5226123179  
H,-2.1641415232,-1.0726540615,4.2004201484  
H,-0.3935929232,0.3191112317,5.1038004802  
H,0.8140095103,-0.3602751455,3.975193936  
H,4.3360371696,-2.8309030306,-1.6746834492  
H,3.9371011249,-1.8251014689,-3.9092850348  
H,1.6711409276,-0.9959451729,-4.5058441936  
H,-1.3195819879,-1.2336906291,-2.2480147839  
H,-0.4607108532,-1.5382276574,-5.2027544882  
H,-2.1207401794,-1.5141520294,-4.5673198866  
H,-1.0374051673,-2.8822531921,-4.1922610095  
H,-0.4821486815,1.0349090492,-2.3714527856  
H,-1.6242207049,0.795937565,-3.7015874623  
H,0.127204579,0.7932039793,-4.0502514722  
H,1.8870920816,-2.7056142561,1.1039611816

H,4.7309392823,-3.6240489739,0.3181181011  
H,4.0973772026,-3.3153848857,1.9426144478  
H,4.3483170499,-1.956302663,0.8070191669  
H,1.1650538295,-4.8824531181,0.1865440328  
H,2.4560001974,-5.14292269,1.3801258145  
H,2.8245554127,-5.2380204836,-0.3636959869  
H,0.2271205794,2.6128953695,4.2414318805  
H,0.2609561112,2.8506968125,2.4600772923  
H,1.4518922473,1.7695921276,3.2362347489  
H,-2.616429413,0.6757696554,2.9142704071  
H,-2.0578939703,2.2752127425,2.4271835067  
H,-2.1171600078,1.8562533832,4.1867410458  
H,2.7236364127,-0.396243307,2.081147823  
H,4.9145030558,0.6648721429,1.8048502514  
H,3.1286028514,3.0903245061,-1.3549614738  
H,1.0029697484,1.9303374548,-0.891886573  
H,5.3846540557,3.2479075226,-2.0508308913  
H,6.6176516303,4.0418101821,-1.0366509755  
H,4.9055504103,4.5017563528,-0.8645340859  
H,6.4603162855,2.4171675791,1.8595856316  
H,7.4839959173,2.8602094428,0.4715326119  
H,6.8931100033,1.186816586,0.6302867954  
H,-5.9169585553,1.2983932696,-1.4270672892  
H,-5.7248842458,3.7641521433,-1.7325063337  
H,-3.5775484725,4.8983307304,-1.1746610705  
H,-0.6040575123,3.0847879291,0.2151321785  
H,-0.3811837247,3.5132424614,-2.2467370108  
H,0.4043201569,4.8234962704,-1.3096899232  
H,-1.1902146492,5.0814871056,-2.0652338267  
H,-2.0995166476,5.7911868652,0.3101109359  
H,-0.4943298819,5.4637047253,1.0012332885  
H,-1.944289104,4.654841933,1.6638944975  
H,-3.0665494377,-0.8744473032,-0.3237335792  
H,-4.5255935787,-0.2750746881,1.6185308904  
H,-4.9995104247,-1.850944152,0.9191982363  
H,-5.9701964106,-0.3869546237,0.5878117298  
H,-4.6821618722,-2.2820149775,-1.5892751236  
H,-4.0230569331,-1.0023945615,-2.647805171  
H,-5.6696864437,-0.8581774492,-1.9916613928

---

1 X. Xu, X. Y. Xu, Y. F. Chen and J. Sun, *Organometallics*, 2008, **27**, 758.

2 (a) G. M. Sheldrick, *SADABS*, An Empirical Absorption Correction Program for

---

Area Detector Data. University of Goettingen, Germany, 1996. (b) G. M. Sheldrick, *SHELXS-97*, University of Goettingen, Germany, 1997. (c) *SMART* Version 5.628, Bruker Asx Inc. (d) *SAINTE* + Version 6.22a, Bruker Axs Inc. (e) *SHELXTL* NT/2000, Version 6.1.

3 (a) P. Hohenberg and W. Kohn, *Phys. Rev.* 1964, **136**, B864. (b) W. Kohn and L. Sham, *J. Phys. Rev.* 1965, **140**, A1133.

4 M. J. Frisch, G. W. Trucks, H. B. Schlegel, G. E. Scuseria, M. A. Robb, J. R. Cheeseman, J. A. Montgomery, Jr, T. Vreven, K. N. Kudin, J. C. Burant, J. M. Millam, S. S. Iyengar, J. Tomasi, V. Barone, B. Mennucci, M. Cossi, G. Scalmani, N. Rega, G. A. Petersson, H. Nakatsuji, M. Hada, M. Ehara, K. Toyota, R. Fukuda, J. Hasegawa, M. Ishida, T. Nakajima, Y. Honda, O. Kitao, M. J. Frisch, H. Nakai, M. Klene, X. Li, J. E. Knox, H. P. Hratchian, J. B. Cross, C. Adamo, J. Jaramillo, R. Gomperts, R. E. Stratmann, O. Yazyev, A. J. Austin, R. Cammi, C. Pomelli, J. W. Ochterski, P. Y. Ayala, K. Morokuma, G. A. Voth, P. Salvador, J. J. Dannenberg, V. G. Zakrzewski, S. Dapprich, A. D. Daniels, M. C. Strain, O. Farkas, D. K. Malick, A. D. Rabuck, K. Raghavachari, J. B. Foresman, J. V. Ortiz, Q. Cui, A. G. Baboul, S. Clifford, J. Cioslowski, B. B. Stefanov, G. Liu, A. Liashenko, P. Piskorz, I. Komaromi, R. L. Martin, D. J. Fox, T. Keith, M. A. Al-Laham, C. Y. Peng, A. Nanayakkara, M. Challacombe, P. M. W. Gill, B. Johnson, W. Chen, M. W. Wong, C. Gonzalez and J. A. Pople, *Gaussian 03*, Revision C.02; Gaussian, Inc., Wallingford CT, 2004.

5 (a) A. D. Becke, *J. Chem. Phys.* 1993, **98**, 5648; (b) C. Lee, W. Yang and R. G. Parr, *Phys. Rev.* 1988, **B37**, 785.

6 W. R. Wadt and P. J. Hay, *J. Chem. Phys.* 1985, **82**, 284.

7 A. E. Reed, L. A. Curtiss and F. Weinhold, *Chem. Rev.* 1988, **88**, 899.

8 (a) V. N. Nemykin and R. G. Hadt, *Inorg. Chem.* 2006, **45**, 8297. (b) R. G. Hadt, V. N. Nemykin, J. G. Olsen and P. Basu, *Phys. Chem. Chem. Phys.* 2009, **11**, 10377.
